# Supplementary material for: Proteotyping of biogas plant microbiomes separates biogas plants according to process temperature and reactor type
Source: PubMed Central journal article supplement (PMC4960849; doi:10.1186/s13068-016-0572-4), 2016-07-26
Supplement: 13068_2016_572_MOESM22_ESM.pdf [file 13068_2016_572_MOESM22_ESM.pdf]

## Main class for investigation of metaproteome data

Name: Start.m Author: Robert Heyer Date : 01.06.2015 Version: 03

### Contents

---

- [Clean everything](#)
- [Load classifications](#)
- [Taxonomy Data](#)
- [Process data](#)
- [Biological function Ontology](#)
- [Metaprotein Data](#)
- [Perform mixed correlations necessary that both matrixes has the same number of entries](#)
- [FINISH](#)

### Clean everything

---

```
clc; clear all; close all;
```

### Load classifications

---

C.reactor, C.pH, C.tan, C.power,C.biogas, C.vfa, C.oler, C.srt, C.temp , C.fa, C.biogasPerOlr

```
C = LoadClassification();
```

### Taxonomy Data

---

#### 1. Read taxonomy data

```
[tax_matrix_original, TaxMatrixPlusDescription] = ReadTaxFiles();  
% Sort by taxonomy profile  
  
% 2. Remove root entry  
for root = 1: size(tax_matrix_original, 1)  
    if (strcmp(tax_matrix_original(root,1), 'root'))  
        tax_matrix_original(root,:) = [];  
        break  
    end  
end  
clearvars root;  
  
% 3. Contracting the length of the sample names  
for entry = 2: size(tax_matrix_original, 2)  
    str = cell2mat(tax_matrix_original(1, entry));  
    tax_matrix_original(1, entry) = {regexprep(str, 'RH_Tax_Order_UniRef50_allSpecies_Gent', '' )};  
end  
clearvars str, entry;  
  
% Remove "Unknown"-entry  
for unknown = 1: size(tax_matrix_original, 1)  
    if (strcmp(tax_matrix_original(unknown,1), 'unknown'))  
        tax_matrix_original(unknown,:) = [];  
        break; % 'UNKNOWN' is only once in the dataset  
    end  
end  
clearvars unknown;
```

```

end
clearvars unknown;

% 4. Filtering and normalizing of the "tax_matrix_original" with at least
% one entry, were the taxonomy represents at least 1% of the spectra
[tax_matrix_filtered, specAverageBgp] = FilterAndNormalize(tax_matrix_original, 0.01);
% 4b. Sort after the taxTree
tax_matrix_filtered_desc = cell(size(tax_matrix_filtered,1), size(tax_matrix_filtered,2)+5);
tax_matrix_filtered_desc(:,1) = tax_matrix_filtered(:,1);
tax_matrix_filtered_desc(:,7:end) = tax_matrix_filtered(:,2:end);
% Add description to the taxonomy matrix
for tax = 1: size(tax_matrix_filtered,1)
    for entries = 1 : size(TaxMatrixPlusDescription, 1)
        if (isequal(tax_matrix_filtered(tax,1), TaxMatrixPlusDescription(entries,1)) )
            tax_matrix_filtered_desc(tax,2) = TaxMatrixPlusDescription(entries,2); % Superking
            tax_matrix_filtered_desc(tax,3) = TaxMatrixPlusDescription(entries,3); % Kingdom
            tax_matrix_filtered_desc(tax,4) = TaxMatrixPlusDescription(entries,4); % Phylum
            tax_matrix_filtered_desc(tax,5) = TaxMatrixPlusDescription(entries,5); % Class
            tax_matrix_filtered_desc(tax,6) = TaxMatrixPlusDescription(entries,6); % Order
        end
    end
end
clearvars tax entries;

[tax_average_matrix_filtered]= AverageMatrix(tax_matrix_filtered);
% 5. Create the correlation matrix
[tax_correlationMatrix2, pValues] = CalculateCorrelation_V2(tax_average_matrix_filtered, tax_
% Add description to the correlation matrix
tax_correlationMatrix_desc = cell(size(tax_correlationMatrix2,1), size(tax_correlationMatrix2
tax_correlationMatrix_desc(:,1:6) = tax_matrix_filtered_desc(:,1:6);
tax_correlationMatrix_desc(:,7:end) = tax_correlationMatrix2(:,2:end);

% 6. Perform PCA
[coeff, Scores, latent] =PerformPCA(tax_matrix_filtered, tax_matrix_filtered(1, 2:end), 'Tax');
PerformPCA(tax_average_matrix_filtered, tax_average_matrix_filtered(1, 2:end), 'Tax_Norm');

```

```

IMPORTED: RH_Tax_Order_UniRef50_allSpecies_Gent01a
IMPORTED: RH_Tax_Order_UniRef50_allSpecies_Gent01b
IMPORTED: RH_Tax_Order_UniRef50_allSpecies_Gent01c
IMPORTED: RH_Tax_Order_UniRef50_allSpecies_Gent02a
IMPORTED: RH_Tax_Order_UniRef50_allSpecies_Gent02b
IMPORTED: RH_Tax_Order_UniRef50_allSpecies_Gent02c
IMPORTED: RH_Tax_Order_UniRef50_allSpecies_Gent03a
IMPORTED: RH_Tax_Order_UniRef50_allSpecies_Gent03b
IMPORTED: RH_Tax_Order_UniRef50_allSpecies_Gent03c
IMPORTED: RH_Tax_Order_UniRef50_allSpecies_Gent04a
IMPORTED: RH_Tax_Order_UniRef50_allSpecies_Gent04b
IMPORTED: RH_Tax_Order_UniRef50_allSpecies_Gent04c
IMPORTED: RH_Tax_Order_UniRef50_allSpecies_Gent05a
IMPORTED: RH_Tax_Order_UniRef50_allSpecies_Gent05b
IMPORTED: RH_Tax_Order_UniRef50_allSpecies_Gent05c
IMPORTED: RH_Tax_Order_UniRef50_allSpecies_Gent06a
IMPORTED: RH_Tax_Order_UniRef50_allSpecies_Gent06b
IMPORTED: RH_Tax_Order_UniRef50_allSpecies_Gent06c
IMPORTED: RH_Tax_Order_UniRef50_allSpecies_Gent07a
IMPORTED: RH_Tax_Order_UniRef50_allSpecies_Gent07b
IMPORTED: RH_Tax_Order_UniRef50_allSpecies_Gent07c
IMPORTED: RH_Tax_Order_UniRef50_allSpecies_Gent08a
IMPORTED: RH_Tax_Order_UniRef50_allSpecies_Gent08b
IMPORTED: RH_Tax_Order_UniRef50_allSpecies_Gent08c
IMPORTED: RH_Tax_Order_UniRef50_allSpecies_Gent09a
IMPORTED: RH_Tax_Order_UniRef50_allSpecies_Gent09b
IMPORTED: RH_Tax_Order_UniRef50_allSpecies_Gent09c

```

IMPORTED: RH\_Tax\_Order\_UniRef50\_allSpecies\_Gent00c  
IMPORTED: RH\_Tax\_Order\_UniRef50\_allSpecies\_Gent09a  
IMPORTED: RH\_Tax\_Order\_UniRef50\_allSpecies\_Gent09b  
IMPORTED: RH\_Tax\_Order\_UniRef50\_allSpecies\_Gent09c  
IMPORTED: RH\_Tax\_Order\_UniRef50\_allSpecies\_Gent10a  
IMPORTED: RH\_Tax\_Order\_UniRef50\_allSpecies\_Gent10b  
IMPORTED: RH\_Tax\_Order\_UniRef50\_allSpecies\_Gent10c  
IMPORTED: RH\_Tax\_Order\_UniRef50\_allSpecies\_Gent11a  
IMPORTED: RH\_Tax\_Order\_UniRef50\_allSpecies\_Gent11b  
IMPORTED: RH\_Tax\_Order\_UniRef50\_allSpecies\_Gent11c  
IMPORTED: RH\_Tax\_Order\_UniRef50\_allSpecies\_Gent12a  
IMPORTED: RH\_Tax\_Order\_UniRef50\_allSpecies\_Gent12b  
IMPORTED: RH\_Tax\_Order\_UniRef50\_allSpecies\_Gent12c  
IMPORTED: RH\_Tax\_Order\_UniRef50\_allSpecies\_Gent13a  
IMPORTED: RH\_Tax\_Order\_UniRef50\_allSpecies\_Gent13b  
IMPORTED: RH\_Tax\_Order\_UniRef50\_allSpecies\_Gent13c  
IMPORTED: RH\_Tax\_Order\_UniRef50\_allSpecies\_Gent14a  
IMPORTED: RH\_Tax\_Order\_UniRef50\_allSpecies\_Gent14b  
IMPORTED: RH\_Tax\_Order\_UniRef50\_allSpecies\_Gent14c  
IMPORTED: RH\_Tax\_Order\_UniRef50\_allSpecies\_Gent15a  
IMPORTED: RH\_Tax\_Order\_UniRef50\_allSpecies\_Gent15b  
IMPORTED: RH\_Tax\_Order\_UniRef50\_allSpecies\_Gent15c  
IMPORTED: RH\_Tax\_Order\_UniRef50\_allSpecies\_Gent16a  
IMPORTED: RH\_Tax\_Order\_UniRef50\_allSpecies\_Gent16b  
IMPORTED: RH\_Tax\_Order\_UniRef50\_allSpecies\_Gent16c  
IMPORTED: RH\_Tax\_Order\_UniRef50\_allSpecies\_Gent17a  
IMPORTED: RH\_Tax\_Order\_UniRef50\_allSpecies\_Gent17b  
IMPORTED: RH\_Tax\_Order\_UniRef50\_allSpecies\_Gent17c  
IMPORTED: RH\_Tax\_Order\_UniRef50\_allSpecies\_Gent18a  
IMPORTED: RH\_Tax\_Order\_UniRef50\_allSpecies\_Gent18b  
IMPORTED: RH\_Tax\_Order\_UniRef50\_allSpecies\_Gent18c  
IMPORTED: RH\_Tax\_Order\_UniRef50\_allSpecies\_Gent19a  
IMPORTED: RH\_Tax\_Order\_UniRef50\_allSpecies\_Gent19b  
IMPORTED: RH\_Tax\_Order\_UniRef50\_allSpecies\_Gent19c  
IMPORTED: RH\_Tax\_Order\_UniRef50\_allSpecies\_Gent20a  
IMPORTED: RH\_Tax\_Order\_UniRef50\_allSpecies\_Gent20b  
IMPORTED: RH\_Tax\_Order\_UniRef50\_allSpecies\_Gent20c  
IMPORTED: RH\_Tax\_Order\_UniRef50\_allSpecies\_Gent21a  
IMPORTED: RH\_Tax\_Order\_UniRef50\_allSpecies\_Gent21c  
IMPORTED: RH\_Tax\_Order\_UniRef50\_allSpecies\_Gent21d  
IMPORTED: RH\_Tax\_Order\_UniRef50\_allSpecies\_Gent22a  
IMPORTED: RH\_Tax\_Order\_UniRef50\_allSpecies\_Gent22b  
IMPORTED: RH\_Tax\_Order\_UniRef50\_allSpecies\_Gent22c  
IMPORTED: RH\_Tax\_Order\_UniRef50\_allSpecies\_Gent23a  
IMPORTED: RH\_Tax\_Order\_UniRef50\_allSpecies\_Gent23b  
IMPORTED: RH\_Tax\_Order\_UniRef50\_allSpecies\_Gent23c  
IMPORTED: RH\_Tax\_Order\_UniRef50\_allSpecies\_Gent24a  
IMPORTED: RH\_Tax\_Order\_UniRef50\_allSpecies\_Gent24b  
IMPORTED: RH\_Tax\_Order\_UniRef50\_allSpecies\_Gent24c  
IMPORTED: RH\_Tax\_Order\_UniRef50\_allSpecies\_Gent25a  
IMPORTED: RH\_Tax\_Order\_UniRef50\_allSpecies\_Gent25b  
IMPORTED: RH\_Tax\_Order\_UniRef50\_allSpecies\_Gent25c  
IMPORTED: RH\_Tax\_Order\_UniRef50\_allSpecies\_Gent26a  
IMPORTED: RH\_Tax\_Order\_UniRef50\_allSpecies\_Gent26b  
IMPORTED: RH\_Tax\_Order\_UniRef50\_allSpecies\_Gent26c  
IMPORTED: RH\_Tax\_Order\_UniRef50\_allSpecies\_Gent27a  
IMPORTED: RH\_Tax\_Order\_UniRef50\_allSpecies\_Gent27b  
IMPORTED: RH\_Tax\_Order\_UniRef50\_allSpecies\_Gent27c  
IMPORTED: RH\_Tax\_Order\_UniRef50\_allSpecies\_Gent28a  
IMPORTED: RH\_Tax\_Order\_UniRef50\_allSpecies\_Gent28b  
IMPORTED: RH\_Tax\_Order\_UniRef50\_allSpecies\_Gent28c  
IMPORTED: RH\_Tax\_Order\_UniRef50\_allSpecies\_Gent29a  
IMPORTED: RH\_Tax\_Order\_UniRef50\_allSpecies\_Gent29b  
IMPORTED: RH\_Tax\_Order\_UniRef50\_allSpecies\_Gent29c  
IMPORTED: RH\_Tax\_Order\_UniRef50\_allSpecies\_Gent29a

IMPORTED: RH\_Tax\_Order\_UniRef50\_allSpecies\_Gent29a  
IMPORTED: RH\_Tax\_Order\_UniRef50\_allSpecies\_Gent29b  
IMPORTED: RH\_Tax\_Order\_UniRef50\_allSpecies\_Gent29c  
IMPORTED: RH\_Tax\_Order\_UniRef50\_allSpecies\_Gent30a  
IMPORTED: RH\_Tax\_Order\_UniRef50\_allSpecies\_Gent30b  
IMPORTED: RH\_Tax\_Order\_UniRef50\_allSpecies\_Gent30c  
IMPORTED: RH\_Tax\_Order\_UniRef50\_allSpecies\_Gent31a  
IMPORTED: RH\_Tax\_Order\_UniRef50\_allSpecies\_Gent31b  
IMPORTED: RH\_Tax\_Order\_UniRef50\_allSpecies\_Gent31c  
IMPORTED: RH\_Tax\_Order\_UniRef50\_allSpecies\_Gent32a  
IMPORTED: RH\_Tax\_Order\_UniRef50\_allSpecies\_Gent32b  
IMPORTED: RH\_Tax\_Order\_UniRef50\_allSpecies\_Gent32c  
IMPORTED: RH\_Tax\_Order\_UniRef50\_allSpecies\_Gent33a  
IMPORTED: RH\_Tax\_Order\_UniRef50\_allSpecies\_Gent33b  
IMPORTED: RH\_Tax\_Order\_UniRef50\_allSpecies\_Gent33c  
IMPORTED: RH\_Tax\_Order\_UniRef50\_allSpecies\_Gent34a  
IMPORTED: RH\_Tax\_Order\_UniRef50\_allSpecies\_Gent34b  
IMPORTED: RH\_Tax\_Order\_UniRef50\_allSpecies\_Gent34c  
IMPORTED: RH\_Tax\_Order\_UniRef50\_allSpecies\_Gent35a  
IMPORTED: RH\_Tax\_Order\_UniRef50\_allSpecies\_Gent35b  
IMPORTED: RH\_Tax\_Order\_UniRef50\_allSpecies\_Gent35c  
IMPORTED: RH\_Tax\_Order\_UniRef50\_allSpecies\_Gent36a  
IMPORTED: RH\_Tax\_Order\_UniRef50\_allSpecies\_Gent36b  
IMPORTED: RH\_Tax\_Order\_UniRef50\_allSpecies\_Gent36c  
IMPORTED: RH\_Tax\_Order\_UniRef50\_allSpecies\_Gent37a  
IMPORTED: RH\_Tax\_Order\_UniRef50\_allSpecies\_Gent37b  
IMPORTED: RH\_Tax\_Order\_UniRef50\_allSpecies\_Gent37c  
IMPORTED: RH\_Tax\_Order\_UniRef50\_allSpecies\_Gent38a  
IMPORTED: RH\_Tax\_Order\_UniRef50\_allSpecies\_Gent38b  
IMPORTED: RH\_Tax\_Order\_UniRef50\_allSpecies\_Gent38c  
IMPORTED: RH\_Tax\_Order\_UniRef50\_allSpecies\_Gent39a  
IMPORTED: RH\_Tax\_Order\_UniRef50\_allSpecies\_Gent39b  
IMPORTED: RH\_Tax\_Order\_UniRef50\_allSpecies\_Gent39c  
IMPORTED: RH\_Tax\_Order\_UniRef50\_allSpecies\_Gent40a  
IMPORTED: RH\_Tax\_Order\_UniRef50\_allSpecies\_Gent40b  
IMPORTED: RH\_Tax\_Order\_UniRef50\_allSpecies\_Gent40c  
READ: RH\_Tax\_Order\_UniRef50\_allSpecies\_Gent01a  
READ: RH\_Tax\_Order\_UniRef50\_allSpecies\_Gent01b  
READ: RH\_Tax\_Order\_UniRef50\_allSpecies\_Gent01c  
READ: RH\_Tax\_Order\_UniRef50\_allSpecies\_Gent02a  
READ: RH\_Tax\_Order\_UniRef50\_allSpecies\_Gent02b  
READ: RH\_Tax\_Order\_UniRef50\_allSpecies\_Gent02c  
READ: RH\_Tax\_Order\_UniRef50\_allSpecies\_Gent03a  
READ: RH\_Tax\_Order\_UniRef50\_allSpecies\_Gent03b  
READ: RH\_Tax\_Order\_UniRef50\_allSpecies\_Gent03c  
READ: RH\_Tax\_Order\_UniRef50\_allSpecies\_Gent04a  
READ: RH\_Tax\_Order\_UniRef50\_allSpecies\_Gent04b  
READ: RH\_Tax\_Order\_UniRef50\_allSpecies\_Gent04c  
READ: RH\_Tax\_Order\_UniRef50\_allSpecies\_Gent05a  
READ: RH\_Tax\_Order\_UniRef50\_allSpecies\_Gent05b  
READ: RH\_Tax\_Order\_UniRef50\_allSpecies\_Gent05c  
READ: RH\_Tax\_Order\_UniRef50\_allSpecies\_Gent06a  
READ: RH\_Tax\_Order\_UniRef50\_allSpecies\_Gent06b  
READ: RH\_Tax\_Order\_UniRef50\_allSpecies\_Gent06c  
READ: RH\_Tax\_Order\_UniRef50\_allSpecies\_Gent07a  
READ: RH\_Tax\_Order\_UniRef50\_allSpecies\_Gent07b  
READ: RH\_Tax\_Order\_UniRef50\_allSpecies\_Gent07c  
READ: RH\_Tax\_Order\_UniRef50\_allSpecies\_Gent08a  
READ: RH\_Tax\_Order\_UniRef50\_allSpecies\_Gent08b  
READ: RH\_Tax\_Order\_UniRef50\_allSpecies\_Gent08c  
READ: RH\_Tax\_Order\_UniRef50\_allSpecies\_Gent09a  
READ: RH\_Tax\_Order\_UniRef50\_allSpecies\_Gent09b  
READ: RH\_Tax\_Order\_UniRef50\_allSpecies\_Gent09c  
READ: RH\_Tax\_Order\_UniRef50\_allSpecies\_Gent10a  
READ: RH\_Tax\_Order\_UniRef50\_allSpecies\_Gent10b

READ: RH\_Tax\_Order\_UniRef50\_allSpecies\_Gent09c  
READ: RH\_Tax\_Order\_UniRef50\_allSpecies\_Gent09c  
READ: RH\_Tax\_Order\_UniRef50\_allSpecies\_Gent10a  
READ: RH\_Tax\_Order\_UniRef50\_allSpecies\_Gent10b  
READ: RH\_Tax\_Order\_UniRef50\_allSpecies\_Gent10c  
READ: RH\_Tax\_Order\_UniRef50\_allSpecies\_Gent11a  
READ: RH\_Tax\_Order\_UniRef50\_allSpecies\_Gent11b  
READ: RH\_Tax\_Order\_UniRef50\_allSpecies\_Gent11c  
READ: RH\_Tax\_Order\_UniRef50\_allSpecies\_Gent12a  
READ: RH\_Tax\_Order\_UniRef50\_allSpecies\_Gent12b  
READ: RH\_Tax\_Order\_UniRef50\_allSpecies\_Gent12c  
READ: RH\_Tax\_Order\_UniRef50\_allSpecies\_Gent13a  
READ: RH\_Tax\_Order\_UniRef50\_allSpecies\_Gent13b  
READ: RH\_Tax\_Order\_UniRef50\_allSpecies\_Gent13c  
READ: RH\_Tax\_Order\_UniRef50\_allSpecies\_Gent14a  
READ: RH\_Tax\_Order\_UniRef50\_allSpecies\_Gent14b  
READ: RH\_Tax\_Order\_UniRef50\_allSpecies\_Gent14c  
READ: RH\_Tax\_Order\_UniRef50\_allSpecies\_Gent15a  
READ: RH\_Tax\_Order\_UniRef50\_allSpecies\_Gent15b  
READ: RH\_Tax\_Order\_UniRef50\_allSpecies\_Gent15c  
READ: RH\_Tax\_Order\_UniRef50\_allSpecies\_Gent16a  
READ: RH\_Tax\_Order\_UniRef50\_allSpecies\_Gent16b  
READ: RH\_Tax\_Order\_UniRef50\_allSpecies\_Gent16c  
READ: RH\_Tax\_Order\_UniRef50\_allSpecies\_Gent17a  
READ: RH\_Tax\_Order\_UniRef50\_allSpecies\_Gent17b  
READ: RH\_Tax\_Order\_UniRef50\_allSpecies\_Gent17c  
READ: RH\_Tax\_Order\_UniRef50\_allSpecies\_Gent18a  
READ: RH\_Tax\_Order\_UniRef50\_allSpecies\_Gent18b  
READ: RH\_Tax\_Order\_UniRef50\_allSpecies\_Gent18c  
READ: RH\_Tax\_Order\_UniRef50\_allSpecies\_Gent19a  
READ: RH\_Tax\_Order\_UniRef50\_allSpecies\_Gent19b  
READ: RH\_Tax\_Order\_UniRef50\_allSpecies\_Gent19c  
READ: RH\_Tax\_Order\_UniRef50\_allSpecies\_Gent20a  
READ: RH\_Tax\_Order\_UniRef50\_allSpecies\_Gent20b  
READ: RH\_Tax\_Order\_UniRef50\_allSpecies\_Gent20c  
READ: RH\_Tax\_Order\_UniRef50\_allSpecies\_Gent21a  
READ: RH\_Tax\_Order\_UniRef50\_allSpecies\_Gent21c  
READ: RH\_Tax\_Order\_UniRef50\_allSpecies\_Gent21d  
READ: RH\_Tax\_Order\_UniRef50\_allSpecies\_Gent22a  
READ: RH\_Tax\_Order\_UniRef50\_allSpecies\_Gent22b  
READ: RH\_Tax\_Order\_UniRef50\_allSpecies\_Gent22c  
READ: RH\_Tax\_Order\_UniRef50\_allSpecies\_Gent23a  
READ: RH\_Tax\_Order\_UniRef50\_allSpecies\_Gent23b  
READ: RH\_Tax\_Order\_UniRef50\_allSpecies\_Gent23c  
READ: RH\_Tax\_Order\_UniRef50\_allSpecies\_Gent24a  
READ: RH\_Tax\_Order\_UniRef50\_allSpecies\_Gent24b  
READ: RH\_Tax\_Order\_UniRef50\_allSpecies\_Gent24c  
READ: RH\_Tax\_Order\_UniRef50\_allSpecies\_Gent25a  
READ: RH\_Tax\_Order\_UniRef50\_allSpecies\_Gent25b  
READ: RH\_Tax\_Order\_UniRef50\_allSpecies\_Gent25c  
READ: RH\_Tax\_Order\_UniRef50\_allSpecies\_Gent26a  
READ: RH\_Tax\_Order\_UniRef50\_allSpecies\_Gent26b  
READ: RH\_Tax\_Order\_UniRef50\_allSpecies\_Gent26c  
READ: RH\_Tax\_Order\_UniRef50\_allSpecies\_Gent27a  
READ: RH\_Tax\_Order\_UniRef50\_allSpecies\_Gent27b  
READ: RH\_Tax\_Order\_UniRef50\_allSpecies\_Gent27c  
READ: RH\_Tax\_Order\_UniRef50\_allSpecies\_Gent28a  
READ: RH\_Tax\_Order\_UniRef50\_allSpecies\_Gent28b  
READ: RH\_Tax\_Order\_UniRef50\_allSpecies\_Gent28c  
READ: RH\_Tax\_Order\_UniRef50\_allSpecies\_Gent29a  
READ: RH\_Tax\_Order\_UniRef50\_allSpecies\_Gent29b  
READ: RH\_Tax\_Order\_UniRef50\_allSpecies\_Gent29c  
READ: RH\_Tax\_Order\_UniRef50\_allSpecies\_Gent30a  
READ: RH\_Tax\_Order\_UniRef50\_allSpecies\_Gent30b  
READ: RH\_Tax\_Order\_UniRef50\_allSpecies\_Gent30c

```
READ: RH_Tax_Order_UniRef50_allSpecies_Gent30a
READ: RH_Tax_Order_UniRef50_allSpecies_Gent30b
READ: RH_Tax_Order_UniRef50_allSpecies_Gent30c
READ: RH_Tax_Order_UniRef50_allSpecies_Gent31a
READ: RH_Tax_Order_UniRef50_allSpecies_Gent31b
READ: RH_Tax_Order_UniRef50_allSpecies_Gent31c
READ: RH_Tax_Order_UniRef50_allSpecies_Gent32a
READ: RH_Tax_Order_UniRef50_allSpecies_Gent32b
READ: RH_Tax_Order_UniRef50_allSpecies_Gent32c
READ: RH_Tax_Order_UniRef50_allSpecies_Gent33a
READ: RH_Tax_Order_UniRef50_allSpecies_Gent33b
READ: RH_Tax_Order_UniRef50_allSpecies_Gent33c
READ: RH_Tax_Order_UniRef50_allSpecies_Gent34a
READ: RH_Tax_Order_UniRef50_allSpecies_Gent34b
READ: RH_Tax_Order_UniRef50_allSpecies_Gent34c
READ: RH_Tax_Order_UniRef50_allSpecies_Gent35a
READ: RH_Tax_Order_UniRef50_allSpecies_Gent35b
READ: RH_Tax_Order_UniRef50_allSpecies_Gent35c
READ: RH_Tax_Order_UniRef50_allSpecies_Gent36a
READ: RH_Tax_Order_UniRef50_allSpecies_Gent36b
READ: RH_Tax_Order_UniRef50_allSpecies_Gent36c
READ: RH_Tax_Order_UniRef50_allSpecies_Gent37a
READ: RH_Tax_Order_UniRef50_allSpecies_Gent37b
READ: RH_Tax_Order_UniRef50_allSpecies_Gent37c
READ: RH_Tax_Order_UniRef50_allSpecies_Gent38a
READ: RH_Tax_Order_UniRef50_allSpecies_Gent38b
READ: RH_Tax_Order_UniRef50_allSpecies_Gent38c
READ: RH_Tax_Order_UniRef50_allSpecies_Gent39a
READ: RH_Tax_Order_UniRef50_allSpecies_Gent39b
READ: RH_Tax_Order_UniRef50_allSpecies_Gent39c
READ: RH_Tax_Order_UniRef50_allSpecies_Gent40a
READ: RH_Tax_Order_UniRef50_allSpecies_Gent40b
READ: RH_Tax_Order_UniRef50_allSpecies_Gent40c
```

Taxonomy files successfully read:

Matrix was normalized and filtered by threshold 0.01 successfully

CrossCorrelation with Spearman matrix successfully calculated

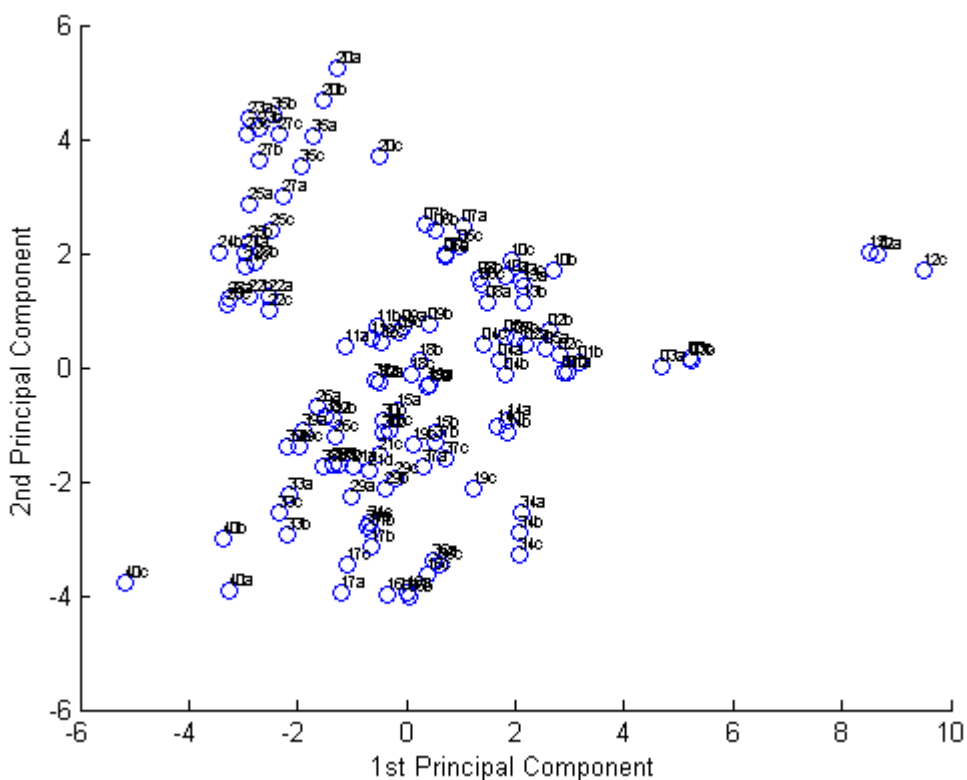

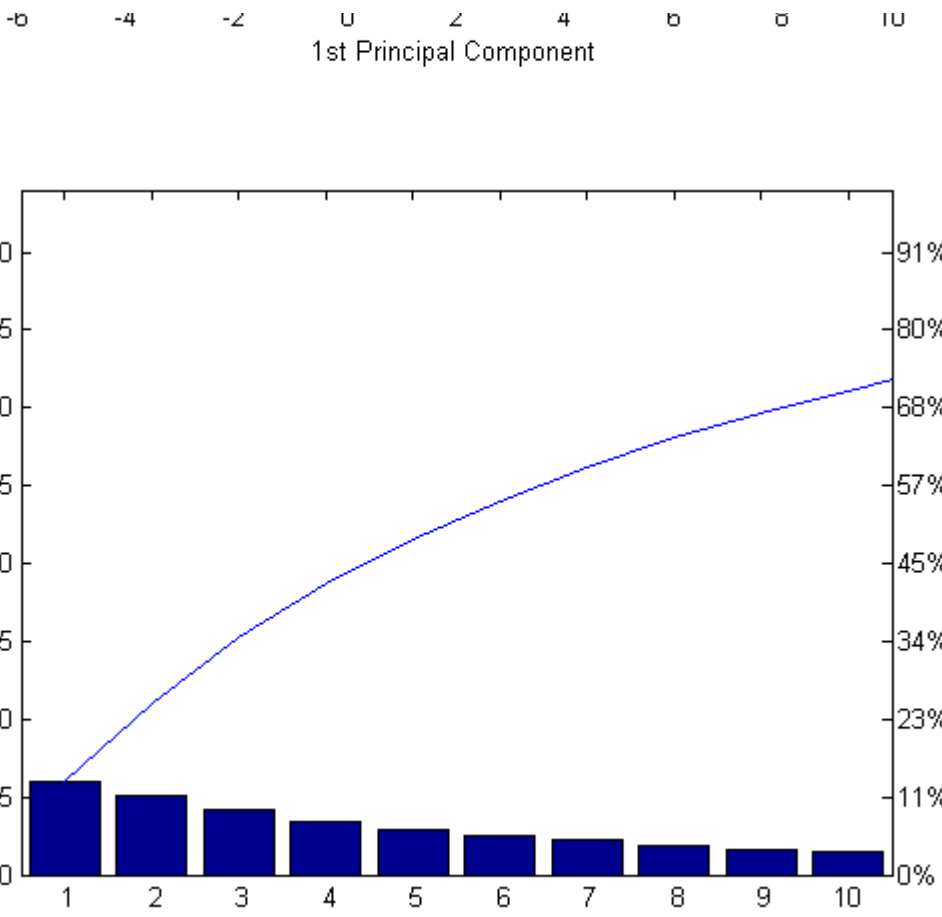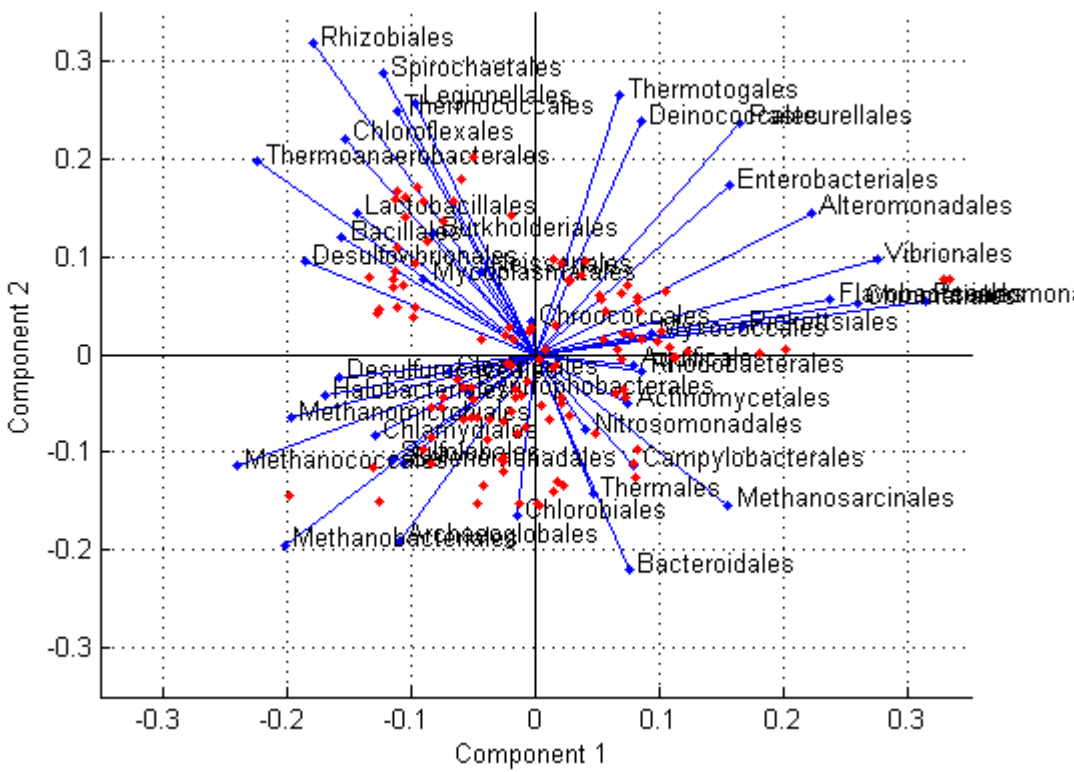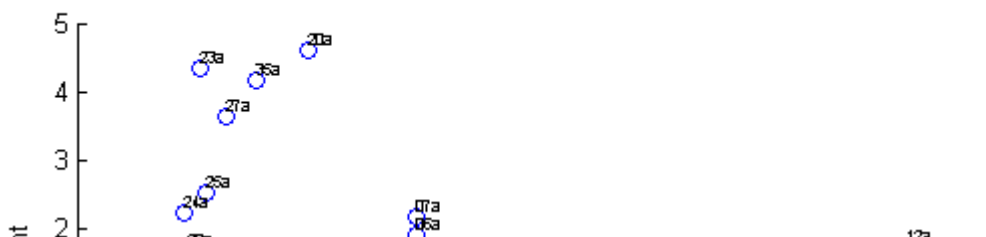

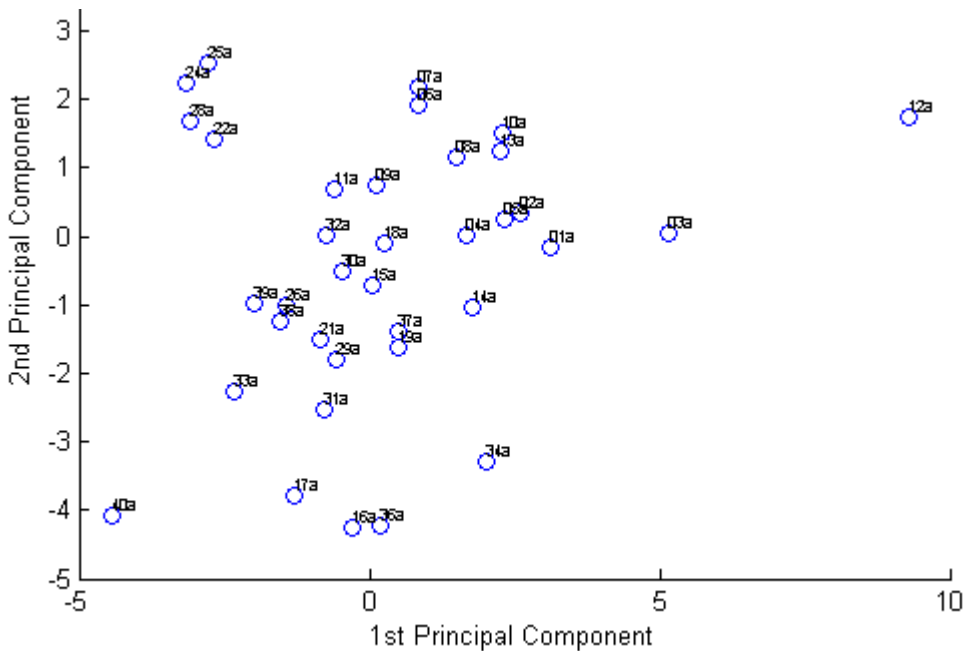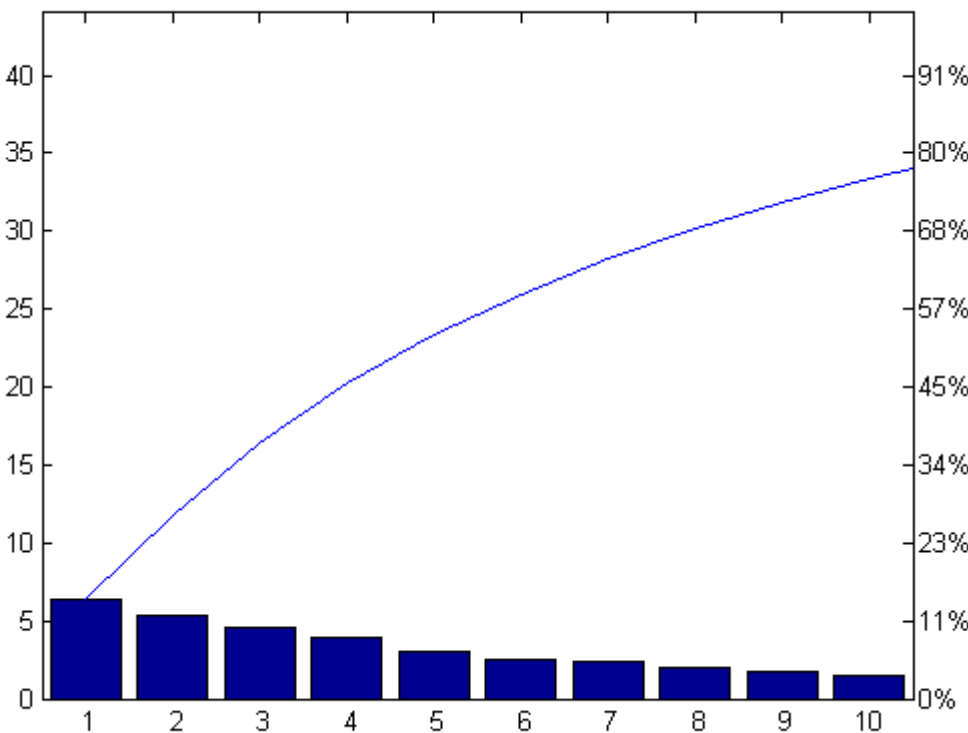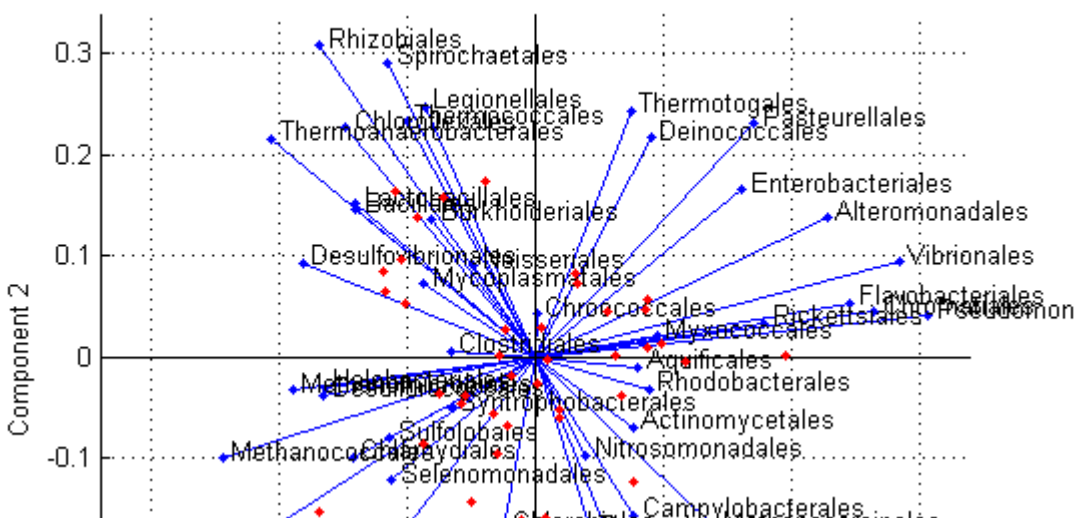



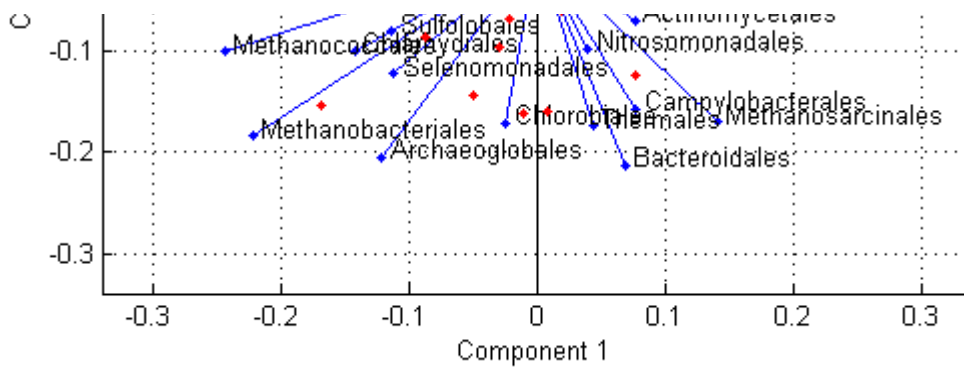

## Process data

1. Read process data rows Variables, cols: BGPs (original matrix is transposed)

```
[meta_matrix] = ReadMetaData();

% 3. Calculate Cross Correlations
[meta_correlationMatrix] = CalculateCorrelation_V2(meta_matrix, meta_matrix);
```

CrossCorrelation with Spearman matrix successfully calculated

## Biological function Ontology

```
% 1. Read biological functions
[onto_matrix_original] = ReadBiolFunctFiles();

% 2. Shorten the entry in the type list
for entry = 2: size(onto_matrix_original, 2)
    str = cell2mat(onto_matrix_original(1, entry));
    onto_matrix_original(1, entry) = {regexprep(str, 'Gent_onto_BiolFunction_UniRef50_allSpeci
end
clearvars str, entry;

% 3. Filter and normalize the onto_matrix
[onto_matrix_filtered] = FilterAndNormalize(onto_matrix_original, 0.01);

% 4. Create average matrix
[onto_average_matrix_filtered]= AverageMatrix(onto_matrix_filtered);

% 5. The correlation matrix
[ onto_correlationMatrix2 ] = CalculateCorrelation_V2(onto_average_matrix_filtered, onto_aver

% 6. Perform PCA
[coeff, Scores, latent]= PerformPCA(onto_matrix_filtered, onto_matrix_filtered(1, 2:end), 'Onto_
PerformPCA(onto_average_matrix_filtered, onto_average_matrix_filtered(1, 2:end), 'Onto_Norm');
```

```
IMPORTED: Gent_onto_BiolFunction_UniRef50_allSpecies_Gent01a
IMPORTED: Gent_onto_BiolFunction_UniRef50_allSpecies_Gent01b
IMPORTED: Gent_onto_BiolFunction_UniRef50_allSpecies_Gent01c
IMPORTED: Gent_onto_BiolFunction_UniRef50_allSpecies_Gent02a
IMPORTED: Gent_onto_BiolFunction_UniRef50_allSpecies_Gent02b
IMPORTED: Gent_onto_BiolFunction_UniRef50_allSpecies_Gent02c
IMPORTED: Gent_onto_BiolFunction_UniRef50_allSpecies_Gent03a
IMPORTED: Gent_onto_BiolFunction_UniRef50_allSpecies_Gent03b
IMPORTED: Gent_onto_BiolFunction_UniRef50_allSpecies_Gent03c
IMPORTED: Gent_onto_BiolFunction_UniRef50_allSpecies_Gent04a
IMPORTED: Gent_onto_BiolFunction_UniRef50_allSpecies_Gent04b
```



IMPORTED: Gent\_Onto\_BiolFunction\_UniRef50\_allSpecies\_Gent24a  
IMPORTED: Gent\_Onto\_BiolFunction\_UniRef50\_allSpecies\_Gent24b  
IMPORTED: Gent\_Onto\_BiolFunction\_UniRef50\_allSpecies\_Gent24c  
IMPORTED: Gent\_Onto\_BiolFunction\_UniRef50\_allSpecies\_Gent25a  
IMPORTED: Gent\_Onto\_BiolFunction\_UniRef50\_allSpecies\_Gent25b  
IMPORTED: Gent\_Onto\_BiolFunction\_UniRef50\_allSpecies\_Gent25c  
IMPORTED: Gent\_Onto\_BiolFunction\_UniRef50\_allSpecies\_Gent26a  
IMPORTED: Gent\_Onto\_BiolFunction\_UniRef50\_allSpecies\_Gent26b  
IMPORTED: Gent\_Onto\_BiolFunction\_UniRef50\_allSpecies\_Gent26c  
IMPORTED: Gent\_Onto\_BiolFunction\_UniRef50\_allSpecies\_Gent27a  
IMPORTED: Gent\_Onto\_BiolFunction\_UniRef50\_allSpecies\_Gent27b  
IMPORTED: Gent\_Onto\_BiolFunction\_UniRef50\_allSpecies\_Gent27c  
IMPORTED: Gent\_Onto\_BiolFunction\_UniRef50\_allSpecies\_Gent28a  
IMPORTED: Gent\_Onto\_BiolFunction\_UniRef50\_allSpecies\_Gent28b  
IMPORTED: Gent\_Onto\_BiolFunction\_UniRef50\_allSpecies\_Gent28c  
IMPORTED: Gent\_Onto\_BiolFunction\_UniRef50\_allSpecies\_Gent29a  
IMPORTED: Gent\_Onto\_BiolFunction\_UniRef50\_allSpecies\_Gent29b  
IMPORTED: Gent\_Onto\_BiolFunction\_UniRef50\_allSpecies\_Gent29c  
IMPORTED: Gent\_Onto\_BiolFunction\_UniRef50\_allSpecies\_Gent30a  
IMPORTED: Gent\_Onto\_BiolFunction\_UniRef50\_allSpecies\_Gent30b  
IMPORTED: Gent\_Onto\_BiolFunction\_UniRef50\_allSpecies\_Gent30c  
IMPORTED: Gent\_Onto\_BiolFunction\_UniRef50\_allSpecies\_Gent31a  
IMPORTED: Gent\_Onto\_BiolFunction\_UniRef50\_allSpecies\_Gent31b  
IMPORTED: Gent\_Onto\_BiolFunction\_UniRef50\_allSpecies\_Gent31c  
IMPORTED: Gent\_Onto\_BiolFunction\_UniRef50\_allSpecies\_Gent32a  
IMPORTED: Gent\_Onto\_BiolFunction\_UniRef50\_allSpecies\_Gent32b  
IMPORTED: Gent\_Onto\_BiolFunction\_UniRef50\_allSpecies\_Gent32c  
IMPORTED: Gent\_Onto\_BiolFunction\_UniRef50\_allSpecies\_Gent33a  
IMPORTED: Gent\_Onto\_BiolFunction\_UniRef50\_allSpecies\_Gent33b  
IMPORTED: Gent\_Onto\_BiolFunction\_UniRef50\_allSpecies\_Gent33c  
IMPORTED: Gent\_Onto\_BiolFunction\_UniRef50\_allSpecies\_Gent34a  
IMPORTED: Gent\_Onto\_BiolFunction\_UniRef50\_allSpecies\_Gent34b  
IMPORTED: Gent\_Onto\_BiolFunction\_UniRef50\_allSpecies\_Gent34c  
IMPORTED: Gent\_Onto\_BiolFunction\_UniRef50\_allSpecies\_Gent35a  
IMPORTED: Gent\_Onto\_BiolFunction\_UniRef50\_allSpecies\_Gent35b  
IMPORTED: Gent\_Onto\_BiolFunction\_UniRef50\_allSpecies\_Gent35c  
IMPORTED: Gent\_Onto\_BiolFunction\_UniRef50\_allSpecies\_Gent36a  
IMPORTED: Gent\_Onto\_BiolFunction\_UniRef50\_allSpecies\_Gent36b  
IMPORTED: Gent\_Onto\_BiolFunction\_UniRef50\_allSpecies\_Gent36c  
IMPORTED: Gent\_Onto\_BiolFunction\_UniRef50\_allSpecies\_Gent37a  
IMPORTED: Gent\_Onto\_BiolFunction\_UniRef50\_allSpecies\_Gent37b  
IMPORTED: Gent\_Onto\_BiolFunction\_UniRef50\_allSpecies\_Gent37c  
IMPORTED: Gent\_Onto\_BiolFunction\_UniRef50\_allSpecies\_Gent38a  
IMPORTED: Gent\_Onto\_BiolFunction\_UniRef50\_allSpecies\_Gent38b  
IMPORTED: Gent\_Onto\_BiolFunction\_UniRef50\_allSpecies\_Gent38c  
IMPORTED: Gent\_Onto\_BiolFunction\_UniRef50\_allSpecies\_Gent39a  
IMPORTED: Gent\_Onto\_BiolFunction\_UniRef50\_allSpecies\_Gent39b  
IMPORTED: Gent\_Onto\_BiolFunction\_UniRef50\_allSpecies\_Gent39c  
IMPORTED: Gent\_Onto\_BiolFunction\_UniRef50\_allSpecies\_Gent40a  
IMPORTED: Gent\_Onto\_BiolFunction\_UniRef50\_allSpecies\_Gent40b  
IMPORTED: Gent\_Onto\_BiolFunction\_UniRef50\_allSpecies\_Gent40c  
Ontology files successfully read:  
Matrix was normalized and filtered by threshold 0.01 successfully  
CrossCorrelation with Spearman matrix successfully calculated

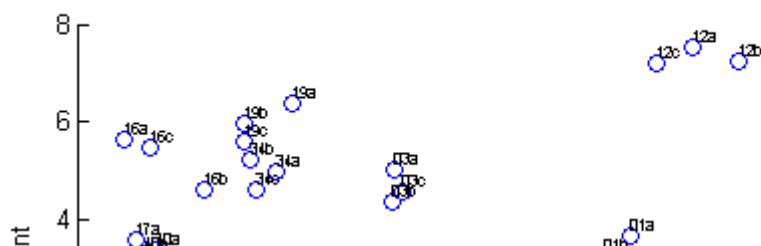

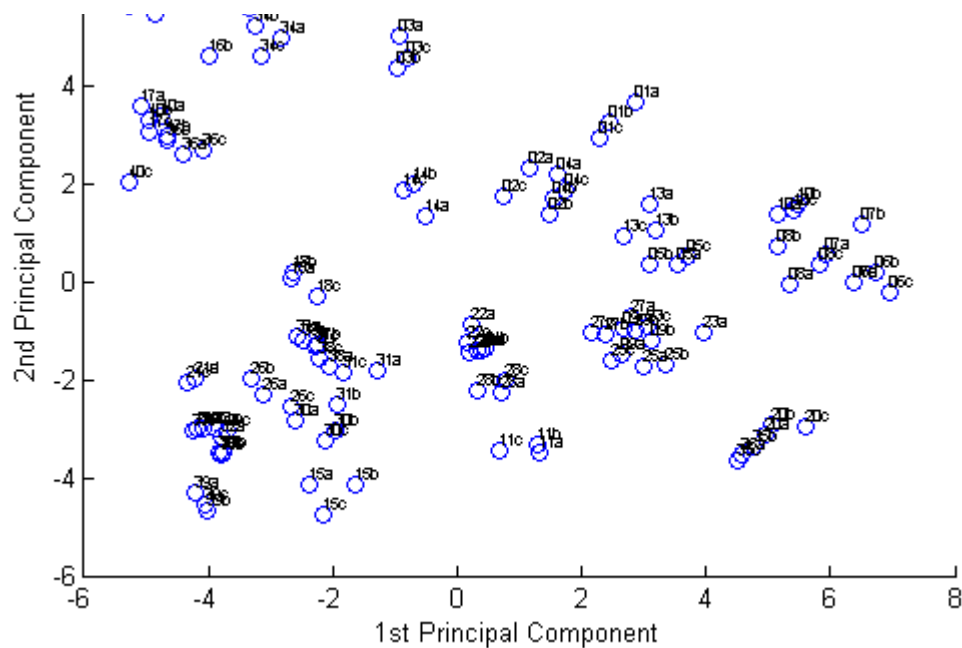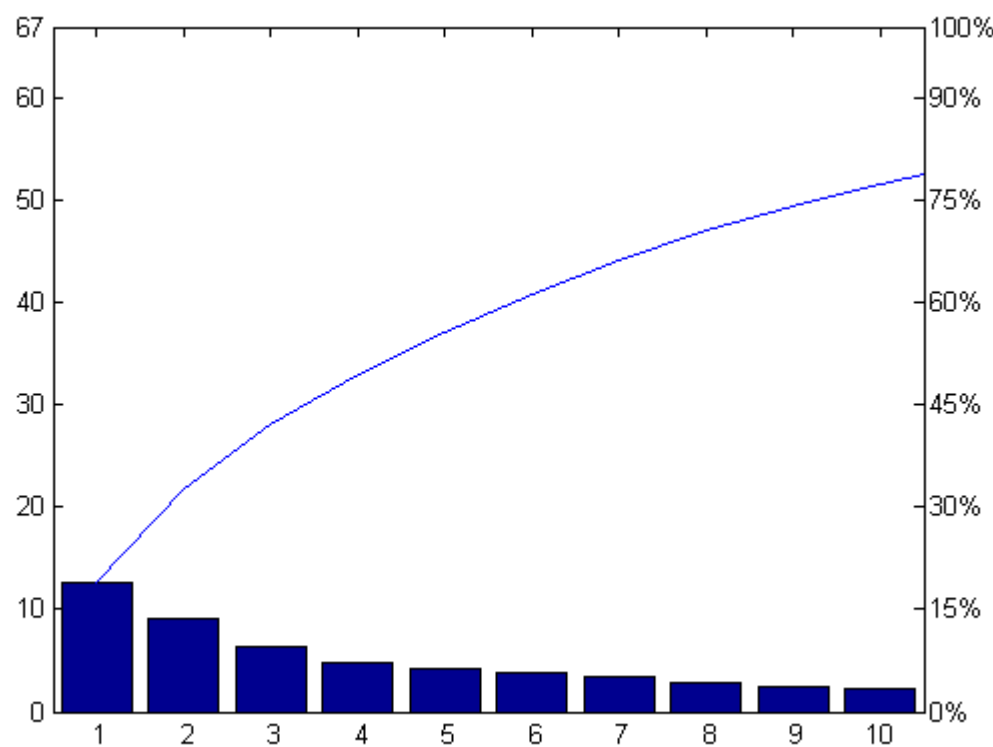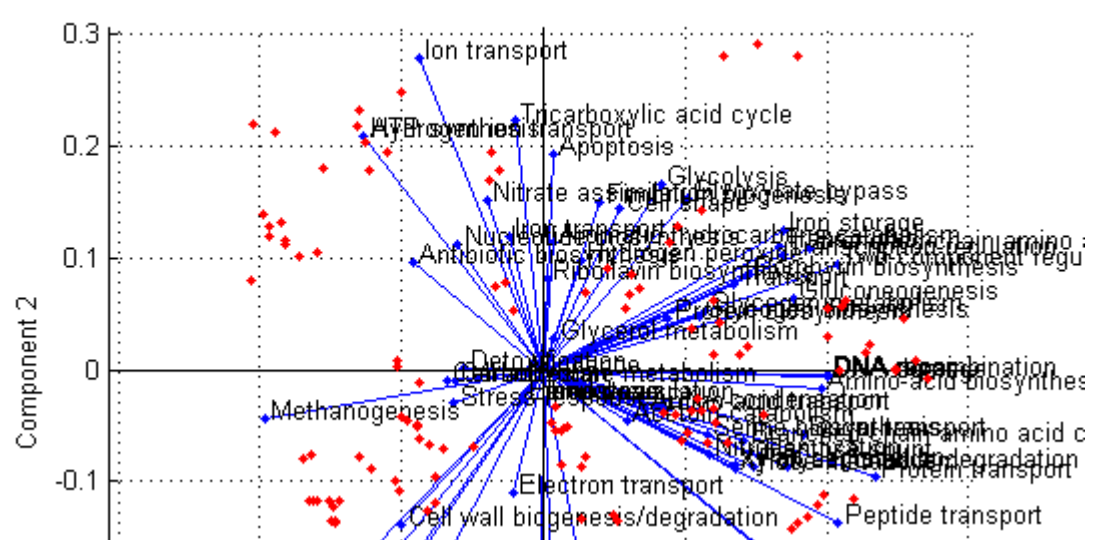

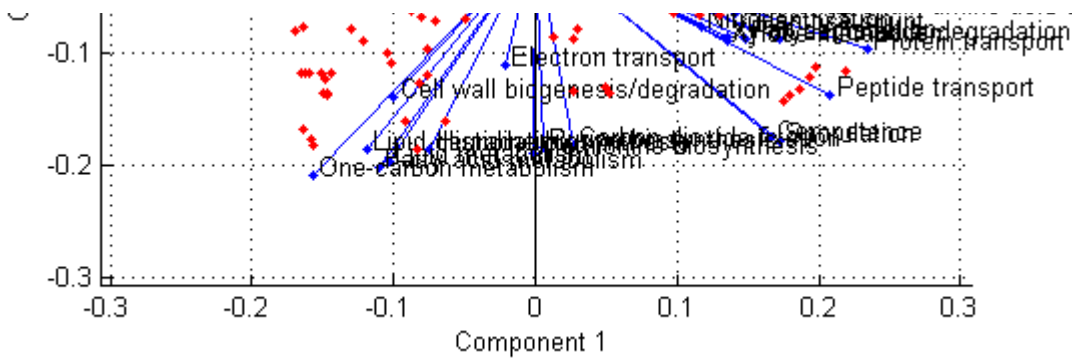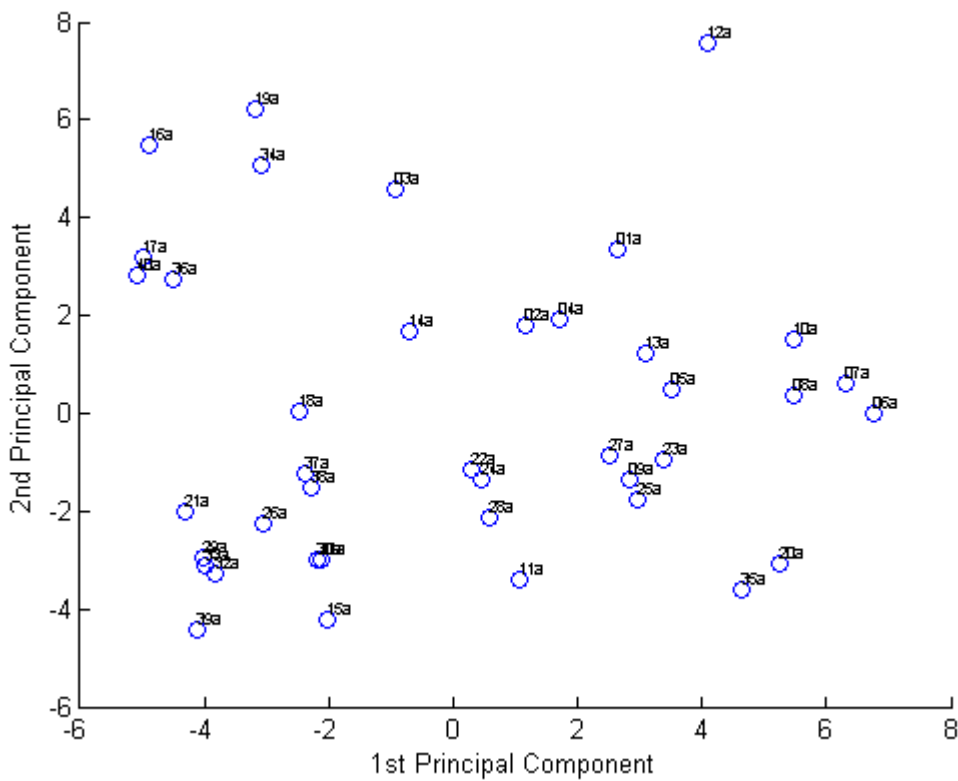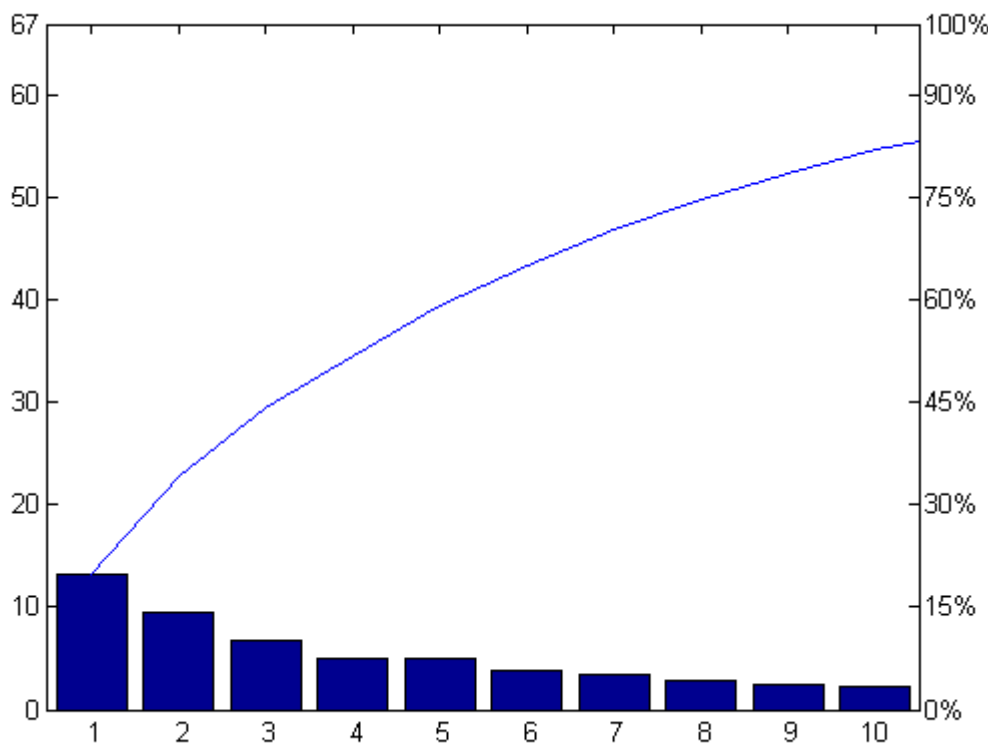

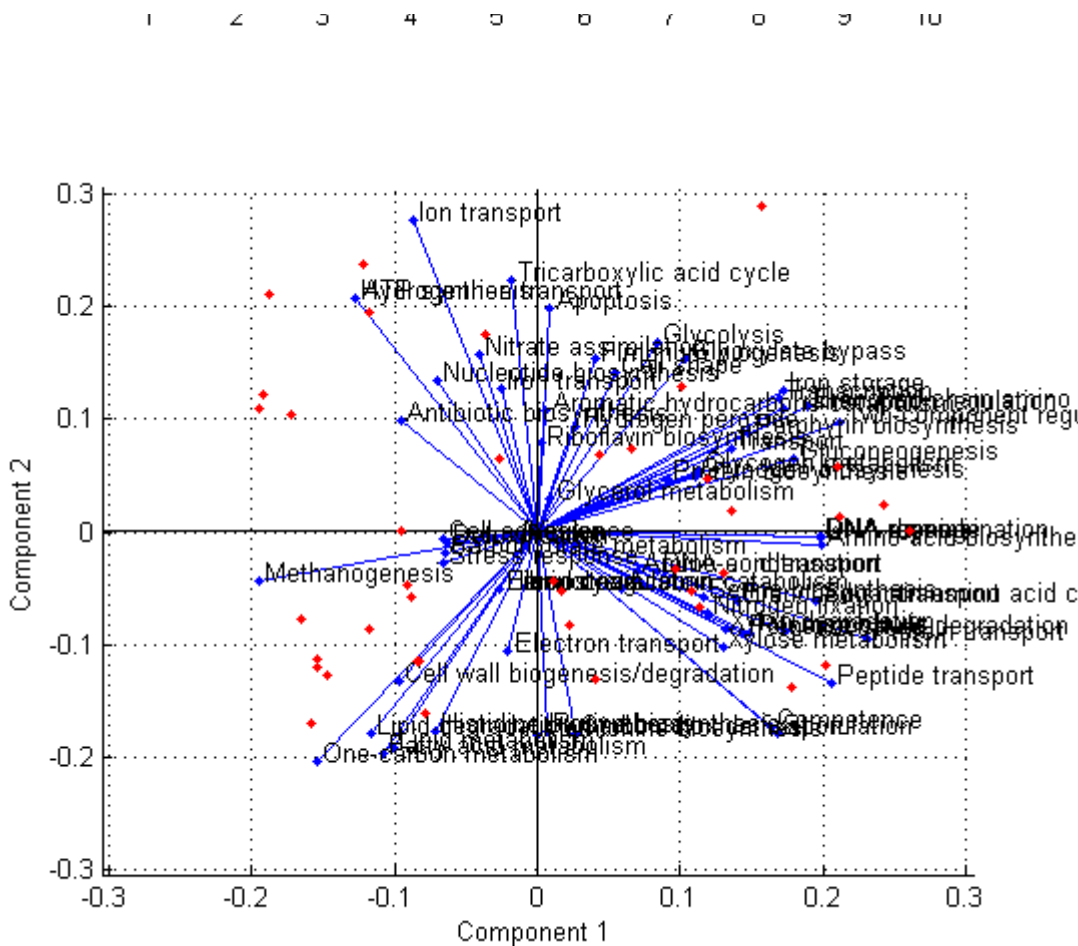

## Metaprotein Data

```

% 1. Read metaprotein data
[mp_matrix_original, MatrixPlusDescription] = ReadMetaProteinFiles();

% 2. Shorten the entry in the type list and shorten the identifier
for entry = 2: size(mp_matrix_original, 2)
    str = cell2mat(mp_matrix_original(1, entry));
    mp_matrix_original(1, entry) = {regexprep(str, 'Gent_MP_UniRef50_allSpecies_Gent', '')} ;
end
clearvars str entry;

% 3. Remove "Unknown"-entry
for unknown = 1: size(MatrixPlusDescription, 1)
    if (strcmp(MatrixPlusDescription(unknown,1), 'UNKNOWN'))
        mp_matrix_original(unknown,:) = [];
        MatrixPlusDescription(unknown,:) = [];
        break; % 'UNKNOWN' is only once in the dataset
    end
end
clearvars unknown;

% 4. Remove "Keratin"-entries and shorten the identifier
remove = [];
for filtered = 2: size(MatrixPlusDescription, 1)
    if (isempty(strfind(cell2mat(MatrixPlusDescription(filtered,2)), 'Keratin')) == false);
        remove(end+1,1) = filtered;
    end
    % Shorten the identifier by removing UniRef50_
    str = cell2mat(MatrixPlusDescription(filtered,1));
    MatrixPlusDescription(filtered,1) = {regexprep(str, 'UniRef50_', '')};
    mp_matrix_original(filtered,1) = {regexprep(str, 'UniRef50_', '')};
end
remove = sort(remove, 'descend');

```

```

    mp_matrix_original(filtered,1) = {regexprep(str, 'UniRef50_', '')};
end
remove = sort(remove, 'descend');
for r = 1 :length(remove)
    mp_matrix_original(remove(r),:) = [];
    MatrixPlusDescription(remove(r),:) = [];
end
clearvars unknown r remove filtered;

% 5. Filter and normalize the mp_matrix
[mp_matrix_filtered] = FilterAndNormalize(mp_matrix_original, 0.01);
mp_matrix_filtered_desc = cell(size(mp_matrix_filtered,1), size(mp_matrix_filtered,2)+14);
mp_matrix_filtered_desc(:,1) = mp_matrix_filtered(:,1);
mp_matrix_filtered_desc(:,16:end) = mp_matrix_filtered(:,2:end);

% 6. Create average matrix
[mp_average_matrix_filtered]= AverageMatrix(mp_matrix_filtered);
% Add description to the mp_average_matrix
mp_average_matrix_filtered_desc = cell(size(mp_average_matrix_filtered,1), size(mp_average_ma
mp_average_matrix_filtered_desc(:,1) = mp_average_matrix_filtered(:,1);
mp_average_matrix_filtered_desc(:,16:end) = mp_average_matrix_filtered(:,2:end);
% % Add Metainformation
for mp = 2: size(mp_average_matrix_filtered,1)
    for entries = 2 : size(MatrixPlusDescription, 1)
        if (isequal(mp_average_matrix_filtered_desc(mp,1), MatrixPlusDescription(entries,1)) )
            mp_average_matrix_filtered_desc(mp,2) = MatrixPlusDescription(entries,2); % Descri
            mp_average_matrix_filtered_desc(mp,3) = MatrixPlusDescription(entries,3); % Taxonc
            mp_average_matrix_filtered_desc(mp,4) = MatrixPlusDescription(entries,4); % Superk
            mp_average_matrix_filtered_desc(mp,5) = MatrixPlusDescription(entries,5); % Kingdc
            mp_average_matrix_filtered_desc(mp,6) = MatrixPlusDescription(entries,6); % Phylum
            mp_average_matrix_filtered_desc(mp,7) = MatrixPlusDescription(entries,7); % Class
            mp_average_matrix_filtered_desc(mp,8) = MatrixPlusDescription(entries,8); % Order
            mp_average_matrix_filtered_desc(mp,9) = MatrixPlusDescription(entries,9); % Famili
            mp_average_matrix_filtered_desc(mp,10) = MatrixPlusDescription(entries,10); % Genu
            mp_average_matrix_filtered_desc(mp,11) = MatrixPlusDescription(entries,11); % Spec
            mp_average_matrix_filtered_desc(mp,12) = MatrixPlusDescription(entries,12); % UniF
            mp_average_matrix_filtered_desc(mp,13) = MatrixPlusDescription(entries,13); % UniF
            mp_average_matrix_filtered_desc(mp,14) = MatrixPlusDescription(entries,14); % KO
            mp_average_matrix_filtered_desc(mp,15) = MatrixPlusDescription(entries,15); % EC
        end
    end
end
clearvars mp entries;

% 7. The correlation matrix
[ mp_correlationMatrix2 ] = CalculateCorrelation_V2(mp_average_matrix_filtered, mp_average_m
% Add description to the correlation matrix
mp_correlationMatrix2_desc = cell(size(mp_correlationMatrix2,1), size(mp_correlationMatrix2,2
mp_correlationMatrix2_desc(:,1:15) = mp_average_matrix_filtered_desc(:,1:15);
mp_correlationMatrix2_desc(:,16:end) = mp_correlationMatrix2(:,2:end);

% 8. Perform PCA
[coeff,Scores,latent]=PerformPCA(mp_matrix_filtered, mp_matrix_filtered(1, 2:end),'MP_');
PerformPCA(mp_average_matrix_filtered, mp_average_matrix_filtered(1, 2:end),'MP_Norm');

% Perform Clustergram
figure('Name', 'MP:Clustergram');
clustergram(zscore(cell2mat(mp_matrix_filtered(2:end, 2:end))), 'RowLabels', mp_matrix_filt

```

IMPORTED: Gent\_MP\_UniRef50\_allSpecies\_Gent01a

IMPORTED: Gent\_MP\_UniRef50\_allSpecies\_Gent01b

IMPORTED: Gent\_MP\_UniRef50\_allSpecies\_Gent01c

IMPORTED: Gent\_MP\_UniRef50\_allSpecies\_Gent02a

```
IMPORTED: Gent_MP_UniRef50_allSpecies_Gent01b
IMPORTED: Gent_MP_UniRef50_allSpecies_Gent01c
IMPORTED: Gent_MP_UniRef50_allSpecies_Gent02a
IMPORTED: Gent_MP_UniRef50_allSpecies_Gent02b
IMPORTED: Gent_MP_UniRef50_allSpecies_Gent02c
IMPORTED: Gent_MP_UniRef50_allSpecies_Gent03a
IMPORTED: Gent_MP_UniRef50_allSpecies_Gent03b
IMPORTED: Gent_MP_UniRef50_allSpecies_Gent03c
IMPORTED: Gent_MP_UniRef50_allSpecies_Gent04a
IMPORTED: Gent_MP_UniRef50_allSpecies_Gent04b
IMPORTED: Gent_MP_UniRef50_allSpecies_Gent04c
IMPORTED: Gent_MP_UniRef50_allSpecies_Gent05a
IMPORTED: Gent_MP_UniRef50_allSpecies_Gent05b
IMPORTED: Gent_MP_UniRef50_allSpecies_Gent05c
IMPORTED: Gent_MP_UniRef50_allSpecies_Gent06a
IMPORTED: Gent_MP_UniRef50_allSpecies_Gent06b
IMPORTED: Gent_MP_UniRef50_allSpecies_Gent06c
IMPORTED: Gent_MP_UniRef50_allSpecies_Gent07a
IMPORTED: Gent_MP_UniRef50_allSpecies_Gent07b
IMPORTED: Gent_MP_UniRef50_allSpecies_Gent07c
IMPORTED: Gent_MP_UniRef50_allSpecies_Gent08a
IMPORTED: Gent_MP_UniRef50_allSpecies_Gent08b
IMPORTED: Gent_MP_UniRef50_allSpecies_Gent08c
IMPORTED: Gent_MP_UniRef50_allSpecies_Gent09a
IMPORTED: Gent_MP_UniRef50_allSpecies_Gent09b
IMPORTED: Gent_MP_UniRef50_allSpecies_Gent09c
IMPORTED: Gent_MP_UniRef50_allSpecies_Gent10a
IMPORTED: Gent_MP_UniRef50_allSpecies_Gent10b
IMPORTED: Gent_MP_UniRef50_allSpecies_Gent10c
IMPORTED: Gent_MP_UniRef50_allSpecies_Gent11a
IMPORTED: Gent_MP_UniRef50_allSpecies_Gent11b
IMPORTED: Gent_MP_UniRef50_allSpecies_Gent11c
IMPORTED: Gent_MP_UniRef50_allSpecies_Gent12a
IMPORTED: Gent_MP_UniRef50_allSpecies_Gent12b
IMPORTED: Gent_MP_UniRef50_allSpecies_Gent12c
IMPORTED: Gent_MP_UniRef50_allSpecies_Gent13a
IMPORTED: Gent_MP_UniRef50_allSpecies_Gent13b
IMPORTED: Gent_MP_UniRef50_allSpecies_Gent13c
IMPORTED: Gent_MP_UniRef50_allSpecies_Gent14a
IMPORTED: Gent_MP_UniRef50_allSpecies_Gent14b
IMPORTED: Gent_MP_UniRef50_allSpecies_Gent14c
IMPORTED: Gent_MP_UniRef50_allSpecies_Gent15a
IMPORTED: Gent_MP_UniRef50_allSpecies_Gent15b
IMPORTED: Gent_MP_UniRef50_allSpecies_Gent15c
IMPORTED: Gent_MP_UniRef50_allSpecies_Gent16a
IMPORTED: Gent_MP_UniRef50_allSpecies_Gent16b
IMPORTED: Gent_MP_UniRef50_allSpecies_Gent16c
IMPORTED: Gent_MP_UniRef50_allSpecies_Gent17a
IMPORTED: Gent_MP_UniRef50_allSpecies_Gent17b
IMPORTED: Gent_MP_UniRef50_allSpecies_Gent17c
IMPORTED: Gent_MP_UniRef50_allSpecies_Gent18a
IMPORTED: Gent_MP_UniRef50_allSpecies_Gent18b
IMPORTED: Gent_MP_UniRef50_allSpecies_Gent18c
IMPORTED: Gent_MP_UniRef50_allSpecies_Gent19a
IMPORTED: Gent_MP_UniRef50_allSpecies_Gent19b
IMPORTED: Gent_MP_UniRef50_allSpecies_Gent19c
IMPORTED: Gent_MP_UniRef50_allSpecies_Gent20a
IMPORTED: Gent_MP_UniRef50_allSpecies_Gent20b
IMPORTED: Gent_MP_UniRef50_allSpecies_Gent20c
IMPORTED: Gent_MP_UniRef50_allSpecies_Gent21a
IMPORTED: Gent_MP_UniRef50_allSpecies_Gent21c
IMPORTED: Gent_MP_UniRef50_allSpecies_Gent21d
IMPORTED: Gent_MP_UniRef50_allSpecies_Gent22a
IMPORTED: Gent_MP_UniRef50_allSpecies_Gent22b
```



IMPORTED: Gent\_MP\_UniRef50\_allSpecies\_Gent21d  
IMPORTED: Gent\_MP\_UniRef50\_allSpecies\_Gent22a  
IMPORTED: Gent\_MP\_UniRef50\_allSpecies\_Gent22b  
IMPORTED: Gent\_MP\_UniRef50\_allSpecies\_Gent22c  
IMPORTED: Gent\_MP\_UniRef50\_allSpecies\_Gent23a  
IMPORTED: Gent\_MP\_UniRef50\_allSpecies\_Gent23b  
IMPORTED: Gent\_MP\_UniRef50\_allSpecies\_Gent23c  
IMPORTED: Gent\_MP\_UniRef50\_allSpecies\_Gent24a  
IMPORTED: Gent\_MP\_UniRef50\_allSpecies\_Gent24b  
IMPORTED: Gent\_MP\_UniRef50\_allSpecies\_Gent24c  
IMPORTED: Gent\_MP\_UniRef50\_allSpecies\_Gent25a  
IMPORTED: Gent\_MP\_UniRef50\_allSpecies\_Gent25b  
IMPORTED: Gent\_MP\_UniRef50\_allSpecies\_Gent25c  
IMPORTED: Gent\_MP\_UniRef50\_allSpecies\_Gent26a  
IMPORTED: Gent\_MP\_UniRef50\_allSpecies\_Gent26b  
IMPORTED: Gent\_MP\_UniRef50\_allSpecies\_Gent26c  
IMPORTED: Gent\_MP\_UniRef50\_allSpecies\_Gent27a  
IMPORTED: Gent\_MP\_UniRef50\_allSpecies\_Gent27b  
IMPORTED: Gent\_MP\_UniRef50\_allSpecies\_Gent27c  
IMPORTED: Gent\_MP\_UniRef50\_allSpecies\_Gent28a  
IMPORTED: Gent\_MP\_UniRef50\_allSpecies\_Gent28b  
IMPORTED: Gent\_MP\_UniRef50\_allSpecies\_Gent28c  
IMPORTED: Gent\_MP\_UniRef50\_allSpecies\_Gent29a  
IMPORTED: Gent\_MP\_UniRef50\_allSpecies\_Gent29b  
IMPORTED: Gent\_MP\_UniRef50\_allSpecies\_Gent29c  
IMPORTED: Gent\_MP\_UniRef50\_allSpecies\_Gent30a  
IMPORTED: Gent\_MP\_UniRef50\_allSpecies\_Gent30b  
IMPORTED: Gent\_MP\_UniRef50\_allSpecies\_Gent30c  
IMPORTED: Gent\_MP\_UniRef50\_allSpecies\_Gent31a  
IMPORTED: Gent\_MP\_UniRef50\_allSpecies\_Gent31b  
IMPORTED: Gent\_MP\_UniRef50\_allSpecies\_Gent31c  
IMPORTED: Gent\_MP\_UniRef50\_allSpecies\_Gent32a  
IMPORTED: Gent\_MP\_UniRef50\_allSpecies\_Gent32b  
IMPORTED: Gent\_MP\_UniRef50\_allSpecies\_Gent32c  
IMPORTED: Gent\_MP\_UniRef50\_allSpecies\_Gent33a  
IMPORTED: Gent\_MP\_UniRef50\_allSpecies\_Gent33b  
IMPORTED: Gent\_MP\_UniRef50\_allSpecies\_Gent33c  
IMPORTED: Gent\_MP\_UniRef50\_allSpecies\_Gent34a  
IMPORTED: Gent\_MP\_UniRef50\_allSpecies\_Gent34b  
IMPORTED: Gent\_MP\_UniRef50\_allSpecies\_Gent34c  
IMPORTED: Gent\_MP\_UniRef50\_allSpecies\_Gent35a  
IMPORTED: Gent\_MP\_UniRef50\_allSpecies\_Gent35b  
IMPORTED: Gent\_MP\_UniRef50\_allSpecies\_Gent35c  
IMPORTED: Gent\_MP\_UniRef50\_allSpecies\_Gent36a  
IMPORTED: Gent\_MP\_UniRef50\_allSpecies\_Gent36b  
IMPORTED: Gent\_MP\_UniRef50\_allSpecies\_Gent36c  
IMPORTED: Gent\_MP\_UniRef50\_allSpecies\_Gent37a  
IMPORTED: Gent\_MP\_UniRef50\_allSpecies\_Gent37b  
IMPORTED: Gent\_MP\_UniRef50\_allSpecies\_Gent37c  
IMPORTED: Gent\_MP\_UniRef50\_allSpecies\_Gent38a  
IMPORTED: Gent\_MP\_UniRef50\_allSpecies\_Gent38b  
IMPORTED: Gent\_MP\_UniRef50\_allSpecies\_Gent38c  
IMPORTED: Gent\_MP\_UniRef50\_allSpecies\_Gent39a  
IMPORTED: Gent\_MP\_UniRef50\_allSpecies\_Gent39b  
IMPORTED: Gent\_MP\_UniRef50\_allSpecies\_Gent39c  
IMPORTED: Gent\_MP\_UniRef50\_allSpecies\_Gent40a  
IMPORTED: Gent\_MP\_UniRef50\_allSpecies\_Gent40b  
IMPORTED: Gent\_MP\_UniRef50\_allSpecies\_Gent40c  
READ: Gent\_MP\_UniRef50\_allSpecies\_Gent01a  
READ: Gent\_MP\_UniRef50\_allSpecies\_Gent01b  
READ: Gent\_MP\_UniRef50\_allSpecies\_Gent01c  
READ: Gent\_MP\_UniRef50\_allSpecies\_Gent02a  
READ: Gent\_MP\_UniRef50\_allSpecies\_Gent02b  
READ: Gent\_MP\_UniRef50\_allSpecies\_Gent02c

READ: Gent\_MP\_UniRef50\_allSpecies\_Gent02a  
READ: Gent\_MP\_UniRef50\_allSpecies\_Gent02b  
READ: Gent\_MP\_UniRef50\_allSpecies\_Gent02c  
READ: Gent\_MP\_UniRef50\_allSpecies\_Gent03a  
READ: Gent\_MP\_UniRef50\_allSpecies\_Gent03b  
READ: Gent\_MP\_UniRef50\_allSpecies\_Gent03c  
READ: Gent\_MP\_UniRef50\_allSpecies\_Gent04a  
READ: Gent\_MP\_UniRef50\_allSpecies\_Gent04b  
READ: Gent\_MP\_UniRef50\_allSpecies\_Gent04c  
READ: Gent\_MP\_UniRef50\_allSpecies\_Gent05a  
READ: Gent\_MP\_UniRef50\_allSpecies\_Gent05b  
READ: Gent\_MP\_UniRef50\_allSpecies\_Gent05c  
READ: Gent\_MP\_UniRef50\_allSpecies\_Gent06a  
READ: Gent\_MP\_UniRef50\_allSpecies\_Gent06b  
READ: Gent\_MP\_UniRef50\_allSpecies\_Gent06c  
READ: Gent\_MP\_UniRef50\_allSpecies\_Gent07a  
READ: Gent\_MP\_UniRef50\_allSpecies\_Gent07b  
READ: Gent\_MP\_UniRef50\_allSpecies\_Gent07c  
READ: Gent\_MP\_UniRef50\_allSpecies\_Gent08a  
READ: Gent\_MP\_UniRef50\_allSpecies\_Gent08b  
READ: Gent\_MP\_UniRef50\_allSpecies\_Gent08c  
READ: Gent\_MP\_UniRef50\_allSpecies\_Gent09a  
READ: Gent\_MP\_UniRef50\_allSpecies\_Gent09b  
READ: Gent\_MP\_UniRef50\_allSpecies\_Gent09c  
READ: Gent\_MP\_UniRef50\_allSpecies\_Gent10a  
READ: Gent\_MP\_UniRef50\_allSpecies\_Gent10b  
READ: Gent\_MP\_UniRef50\_allSpecies\_Gent10c  
READ: Gent\_MP\_UniRef50\_allSpecies\_Gent11a  
READ: Gent\_MP\_UniRef50\_allSpecies\_Gent11b  
READ: Gent\_MP\_UniRef50\_allSpecies\_Gent11c  
READ: Gent\_MP\_UniRef50\_allSpecies\_Gent12a  
READ: Gent\_MP\_UniRef50\_allSpecies\_Gent12b  
READ: Gent\_MP\_UniRef50\_allSpecies\_Gent12c  
READ: Gent\_MP\_UniRef50\_allSpecies\_Gent13a  
READ: Gent\_MP\_UniRef50\_allSpecies\_Gent13b  
READ: Gent\_MP\_UniRef50\_allSpecies\_Gent13c  
READ: Gent\_MP\_UniRef50\_allSpecies\_Gent14a  
READ: Gent\_MP\_UniRef50\_allSpecies\_Gent14b  
READ: Gent\_MP\_UniRef50\_allSpecies\_Gent14c  
READ: Gent\_MP\_UniRef50\_allSpecies\_Gent15a  
READ: Gent\_MP\_UniRef50\_allSpecies\_Gent15b  
READ: Gent\_MP\_UniRef50\_allSpecies\_Gent15c  
READ: Gent\_MP\_UniRef50\_allSpecies\_Gent16a  
READ: Gent\_MP\_UniRef50\_allSpecies\_Gent16b  
READ: Gent\_MP\_UniRef50\_allSpecies\_Gent16c  
READ: Gent\_MP\_UniRef50\_allSpecies\_Gent17a  
READ: Gent\_MP\_UniRef50\_allSpecies\_Gent17b  
READ: Gent\_MP\_UniRef50\_allSpecies\_Gent17c  
READ: Gent\_MP\_UniRef50\_allSpecies\_Gent18a  
READ: Gent\_MP\_UniRef50\_allSpecies\_Gent18b  
READ: Gent\_MP\_UniRef50\_allSpecies\_Gent18c  
READ: Gent\_MP\_UniRef50\_allSpecies\_Gent19a  
READ: Gent\_MP\_UniRef50\_allSpecies\_Gent19b  
READ: Gent\_MP\_UniRef50\_allSpecies\_Gent19c  
READ: Gent\_MP\_UniRef50\_allSpecies\_Gent20a  
READ: Gent\_MP\_UniRef50\_allSpecies\_Gent20b  
READ: Gent\_MP\_UniRef50\_allSpecies\_Gent20c  
READ: Gent\_MP\_UniRef50\_allSpecies\_Gent21a  
READ: Gent\_MP\_UniRef50\_allSpecies\_Gent21c  
READ: Gent\_MP\_UniRef50\_allSpecies\_Gent21d  
READ: Gent\_MP\_UniRef50\_allSpecies\_Gent22a  
READ: Gent\_MP\_UniRef50\_allSpecies\_Gent22b  
READ: Gent\_MP\_UniRef50\_allSpecies\_Gent22c  
READ: Gent\_MP\_UniRef50\_allSpecies\_Gent23a

READ: Gent\_MP\_UniRef50\_allSpecies\_Gent22b  
READ: Gent\_MP\_UniRef50\_allSpecies\_Gent22c  
READ: Gent\_MP\_UniRef50\_allSpecies\_Gent23a  
READ: Gent\_MP\_UniRef50\_allSpecies\_Gent23b  
READ: Gent\_MP\_UniRef50\_allSpecies\_Gent23c  
READ: Gent\_MP\_UniRef50\_allSpecies\_Gent24a  
READ: Gent\_MP\_UniRef50\_allSpecies\_Gent24b  
READ: Gent\_MP\_UniRef50\_allSpecies\_Gent24c  
READ: Gent\_MP\_UniRef50\_allSpecies\_Gent25a  
READ: Gent\_MP\_UniRef50\_allSpecies\_Gent25b  
READ: Gent\_MP\_UniRef50\_allSpecies\_Gent25c  
READ: Gent\_MP\_UniRef50\_allSpecies\_Gent26a  
READ: Gent\_MP\_UniRef50\_allSpecies\_Gent26b  
READ: Gent\_MP\_UniRef50\_allSpecies\_Gent26c  
READ: Gent\_MP\_UniRef50\_allSpecies\_Gent27a  
READ: Gent\_MP\_UniRef50\_allSpecies\_Gent27b  
READ: Gent\_MP\_UniRef50\_allSpecies\_Gent27c  
READ: Gent\_MP\_UniRef50\_allSpecies\_Gent28a  
READ: Gent\_MP\_UniRef50\_allSpecies\_Gent28b  
READ: Gent\_MP\_UniRef50\_allSpecies\_Gent28c  
READ: Gent\_MP\_UniRef50\_allSpecies\_Gent29a  
READ: Gent\_MP\_UniRef50\_allSpecies\_Gent29b  
READ: Gent\_MP\_UniRef50\_allSpecies\_Gent29c  
READ: Gent\_MP\_UniRef50\_allSpecies\_Gent30a  
READ: Gent\_MP\_UniRef50\_allSpecies\_Gent30b  
READ: Gent\_MP\_UniRef50\_allSpecies\_Gent30c  
READ: Gent\_MP\_UniRef50\_allSpecies\_Gent31a  
READ: Gent\_MP\_UniRef50\_allSpecies\_Gent31b  
READ: Gent\_MP\_UniRef50\_allSpecies\_Gent31c  
READ: Gent\_MP\_UniRef50\_allSpecies\_Gent32a  
READ: Gent\_MP\_UniRef50\_allSpecies\_Gent32b  
READ: Gent\_MP\_UniRef50\_allSpecies\_Gent32c  
READ: Gent\_MP\_UniRef50\_allSpecies\_Gent33a  
READ: Gent\_MP\_UniRef50\_allSpecies\_Gent33b  
READ: Gent\_MP\_UniRef50\_allSpecies\_Gent33c  
READ: Gent\_MP\_UniRef50\_allSpecies\_Gent34a  
READ: Gent\_MP\_UniRef50\_allSpecies\_Gent34b  
READ: Gent\_MP\_UniRef50\_allSpecies\_Gent34c  
READ: Gent\_MP\_UniRef50\_allSpecies\_Gent35a  
READ: Gent\_MP\_UniRef50\_allSpecies\_Gent35b  
READ: Gent\_MP\_UniRef50\_allSpecies\_Gent35c  
READ: Gent\_MP\_UniRef50\_allSpecies\_Gent36a  
READ: Gent\_MP\_UniRef50\_allSpecies\_Gent36b  
READ: Gent\_MP\_UniRef50\_allSpecies\_Gent36c  
READ: Gent\_MP\_UniRef50\_allSpecies\_Gent37a  
READ: Gent\_MP\_UniRef50\_allSpecies\_Gent37b  
READ: Gent\_MP\_UniRef50\_allSpecies\_Gent37c  
READ: Gent\_MP\_UniRef50\_allSpecies\_Gent38a  
READ: Gent\_MP\_UniRef50\_allSpecies\_Gent38b  
READ: Gent\_MP\_UniRef50\_allSpecies\_Gent38c  
READ: Gent\_MP\_UniRef50\_allSpecies\_Gent39a  
READ: Gent\_MP\_UniRef50\_allSpecies\_Gent39b  
READ: Gent\_MP\_UniRef50\_allSpecies\_Gent39c  
READ: Gent\_MP\_UniRef50\_allSpecies\_Gent40a  
READ: Gent\_MP\_UniRef50\_allSpecies\_Gent40b  
READ: Gent\_MP\_UniRef50\_allSpecies\_Gent40c

MetaProtein files successfully read:

Matrix was normalized and filtered by threshold 0.01 successfully  
CrossCorrelation with Spearman matrix successfully calculated

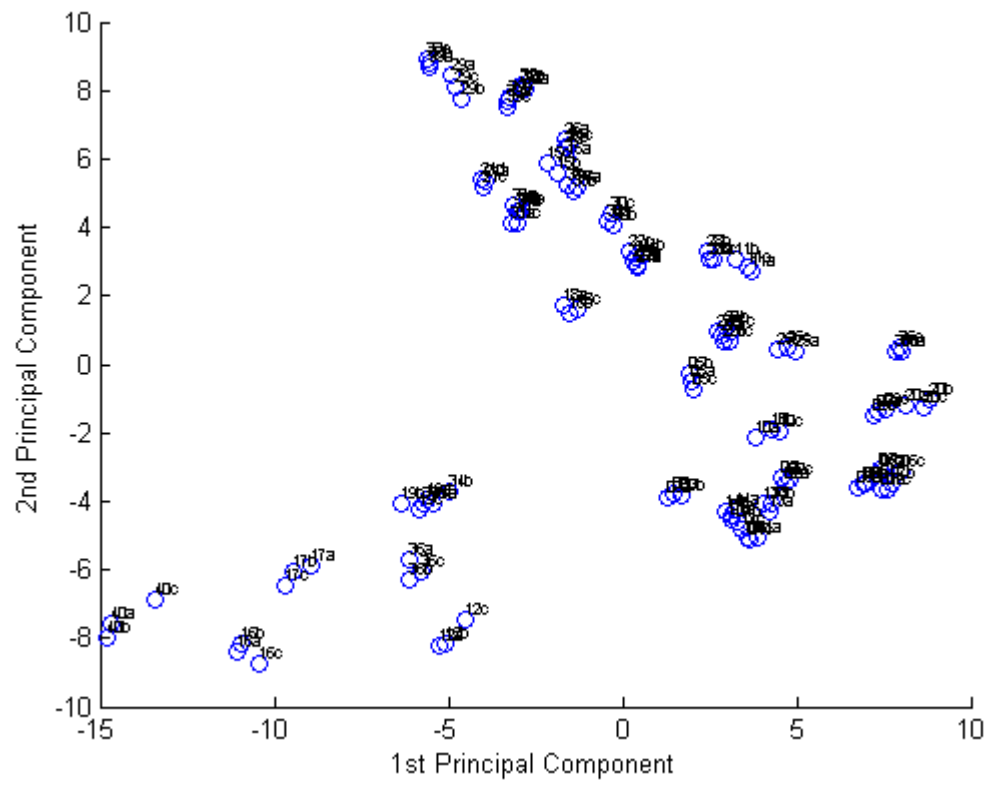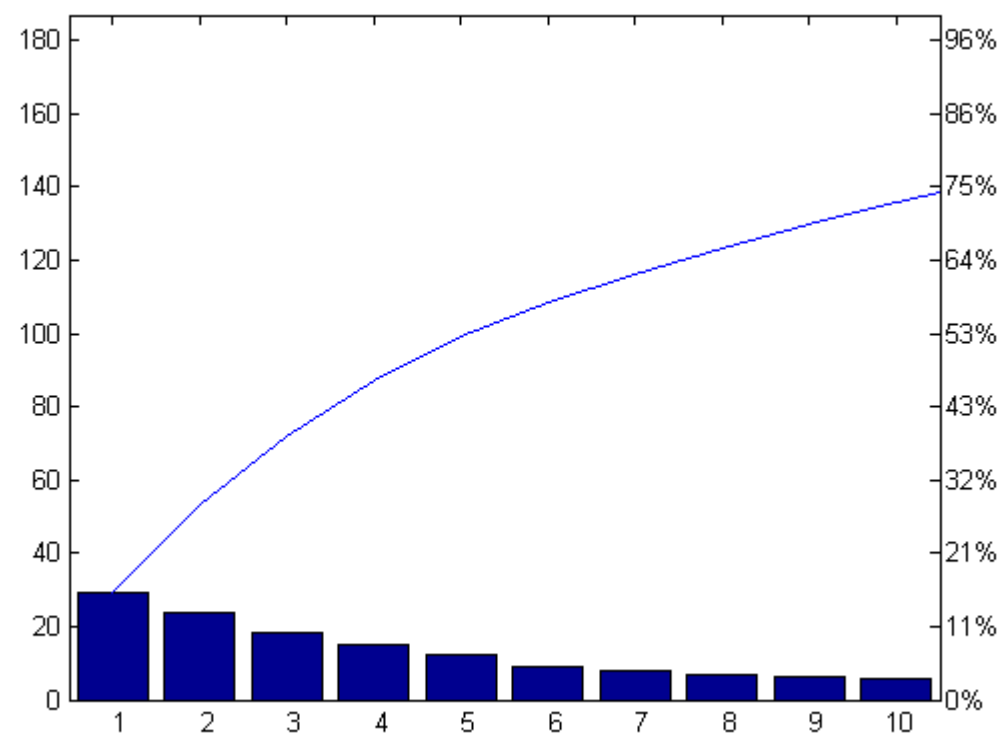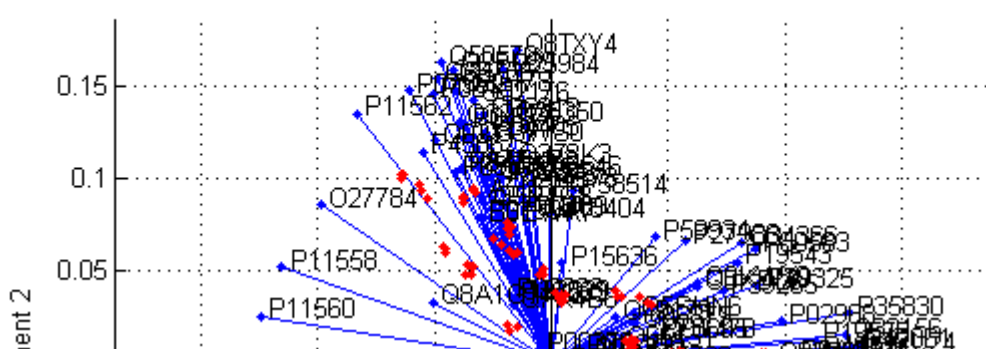

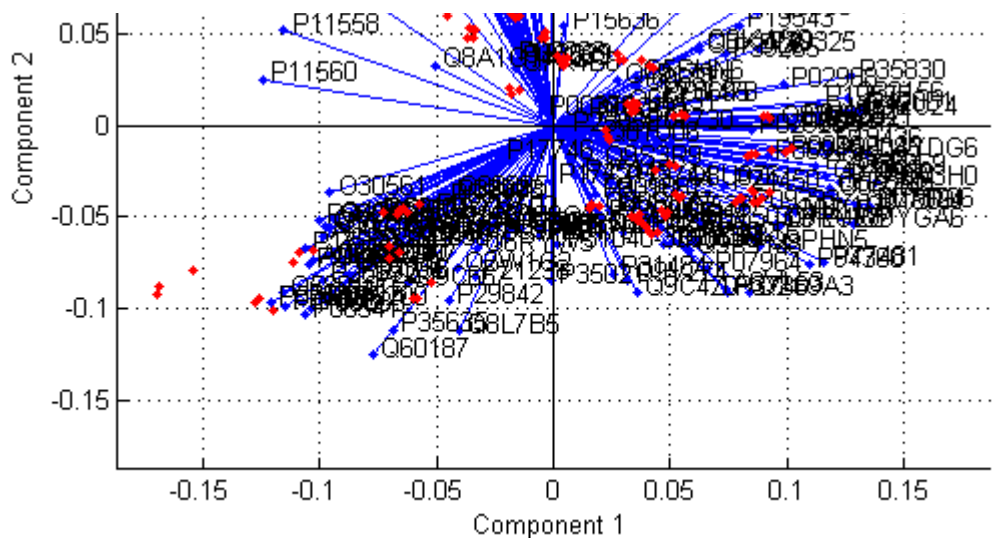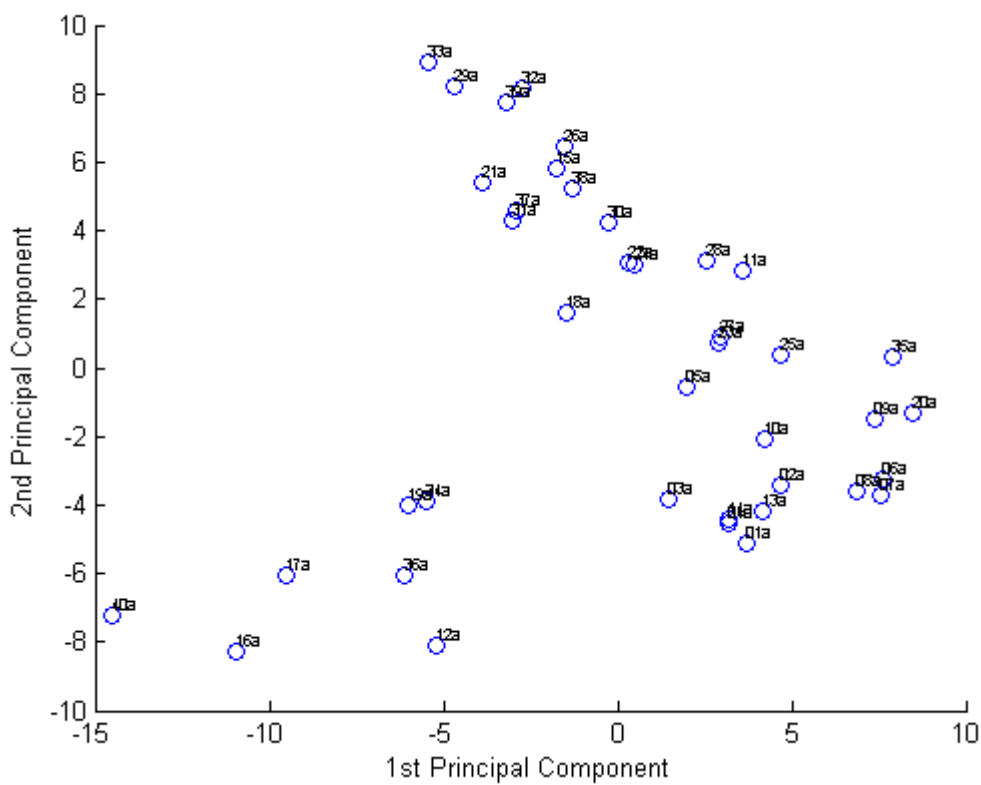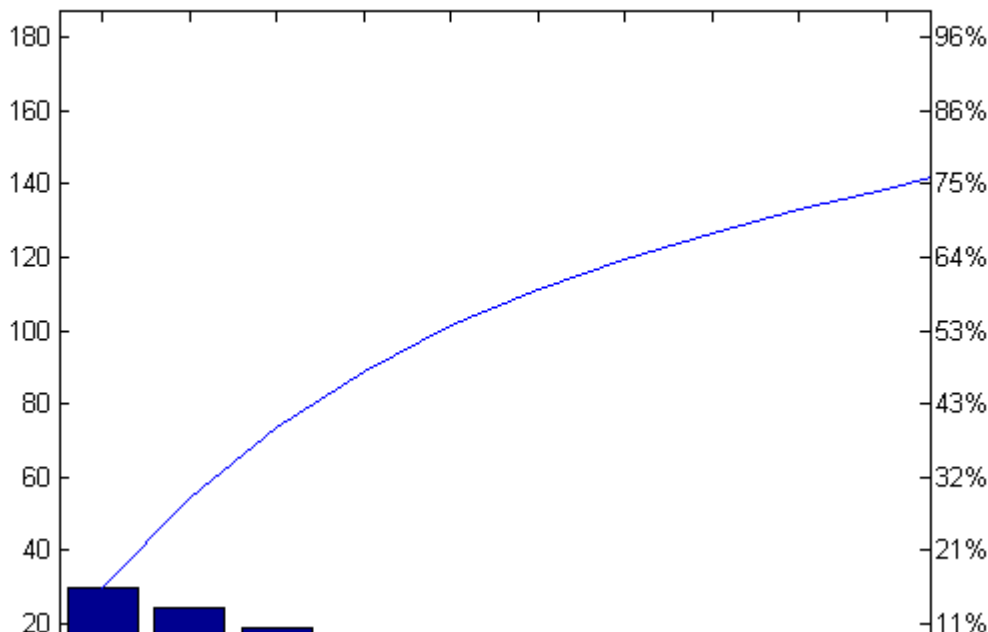

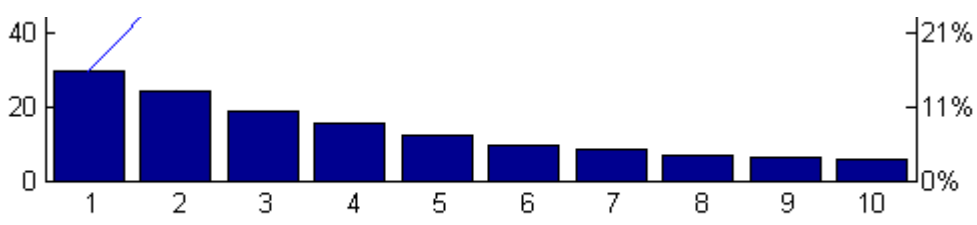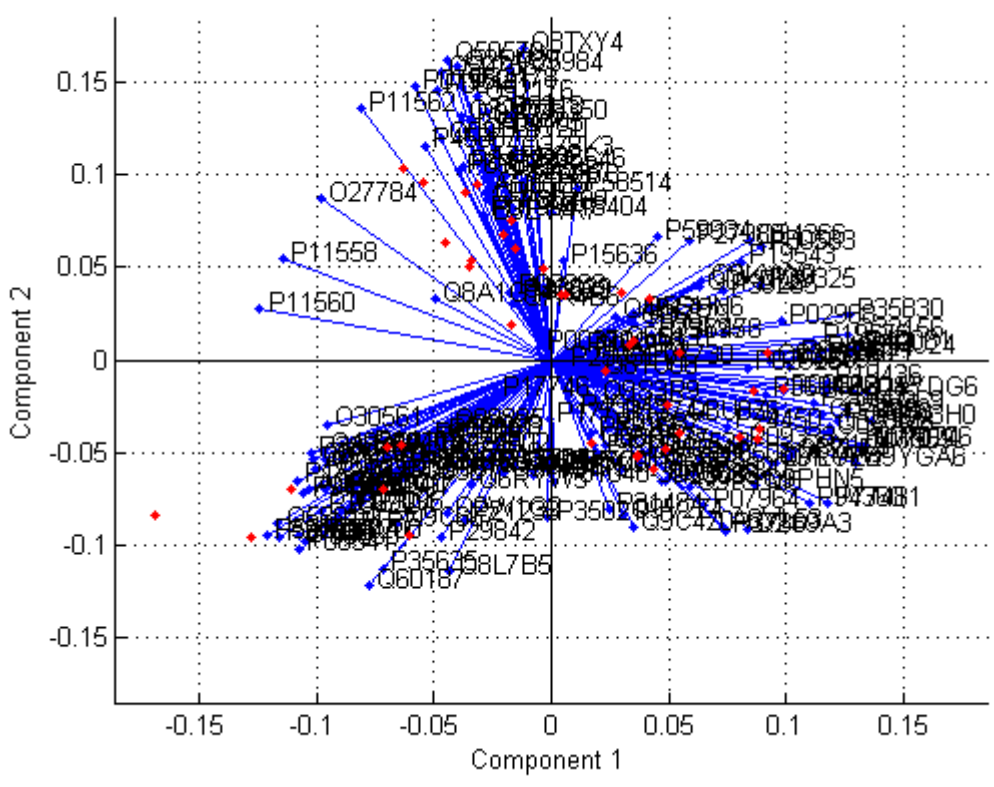

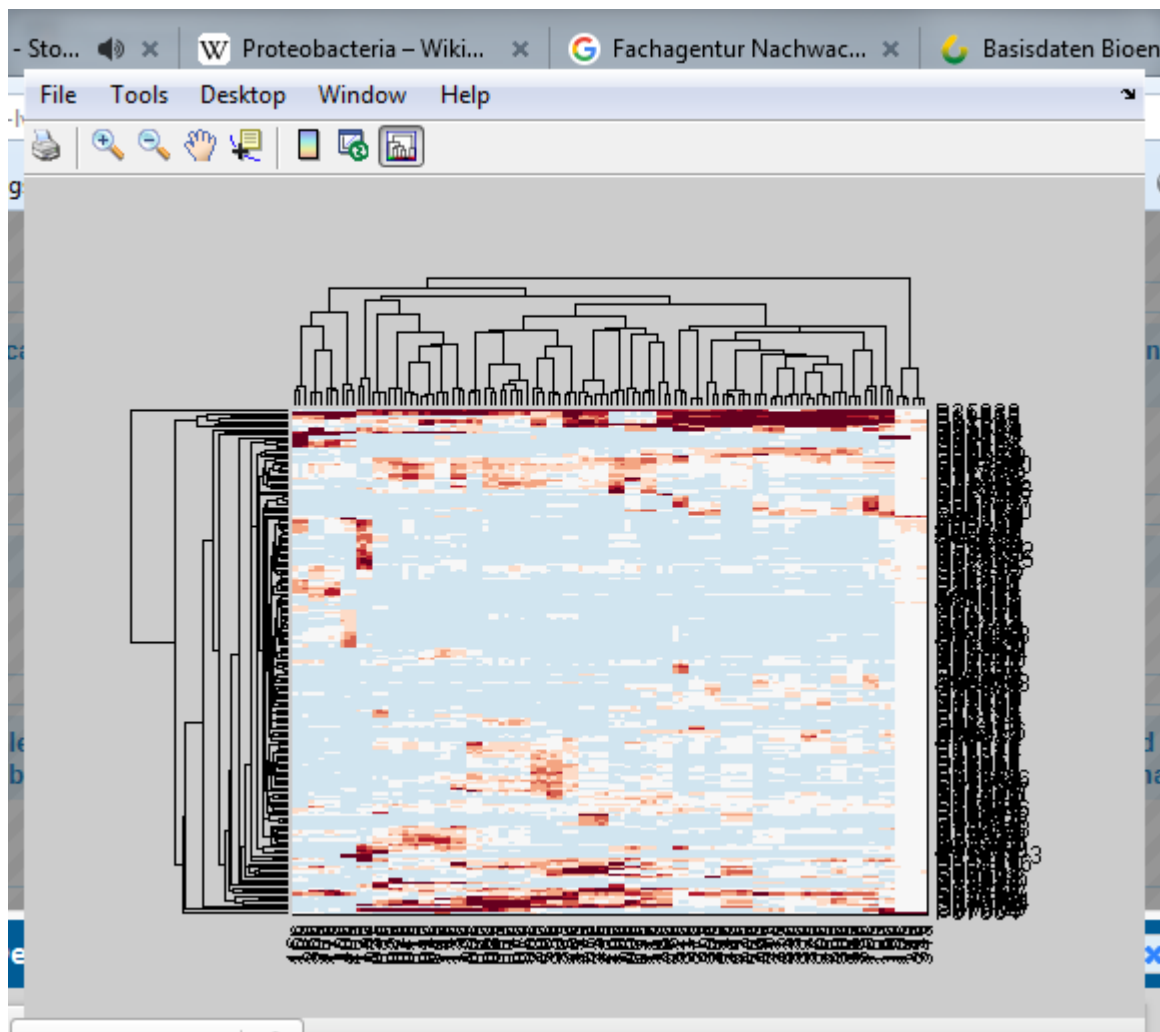

## Perform mixed correlations necessary that both matrixes has the same number of entries

### Metadata

```
[meta_taxo_correlationMatrix ] = CalculateCorrelation_V2(meta_matrix, tax_average_matrix_filt
[meta_onto_correlationMatrix ] = CalculateCorrelation_V2(meta_matrix, onto_average_matrix_fil
[meta_mp_correlationMatrix ] = CalculateCorrelation_V2(meta_matrix, mp_average_matrix_filtere
% Taxodata
[taxo_meta_correlationMatrix ] = CalculateCorrelation_V2(tax_average_matrix_filtered, meta_ma
[taxo_onto_correlationMatrix ] = CalculateCorrelation_V2(tax_average_matrix_filtered, onto_av
[taxo_mp_correlationMatrix ] = CalculateCorrelation_V2(tax_average_matrix_filtered, mp_averag
% Ontodata
[onto_meta_correlationMatrix] = CalculateCorrelation_V2(onto_average_matrix_filtered,meta_mat
[onto_taxo_correlationMatrix ] = CalculateCorrelation_V2(onto_average_matrix_filtered,tax_ave
[onto_mp_correlationMatrix ] = CalculateCorrelation_V2(onto_average_matrix_filtered, mp_avera
% MPdata
[mp_meta_correlationMatrix ] = CalculateCorrelation_V2(mp_average_matrix_filtered,meta_matrix
[mp_taxo_correlationMatrix ] = CalculateCorrelation_V2(mp_average_matrix_filtered,tax_average
[mp_onto_correlationMatrix ] = CalculateCorrelation_V2(mp_average_matrix_filtered, onto_avera
```

```
CrossCorrelation with Spearman matrix successfully calculated
```

```
CrossCorrelation with Spearman matrix successfully calculated  
CrossCorrelation with Spearman matrix successfully calculated
```

## FINISH

---

```
disp('Finish')
```

---

Finish

---

*Published with MATLAB® R2014a*
