# Supplementary material for: Proteotyping of biogas plant microbiomes separates biogas plants according to process temperature and reactor type
Source: Biotechnol Biofuels. 2016 Jul 26;9:155. doi: 10.1186/s13068-016-0572-4 (PMC4960849; doi:10.1186/s13068-016-0572-4)
Supplement: Supplementary file 20 — 10.1186/s13068-016-0572-4 Matlab files for the statistical data evaluation. In order to execute the statistical data evaluation run the file “Additional_File_20_Start_Data_Analysis.m”. After that you have to select subsequently all files for the taxonomic orders (“Additional_Files_20_Taxonomic_Order_UniRef50_allSpecies_GentXXx.csv”), biological processes (“Additional_Files_20_Gent_Biological_Process_UniRef50_allSpecies_GentXXx.csv”) as well metaproteins (“Additional_Files_20_Gent_Metaproteins_UniRef50_allSpecies_GentXXx.m”). [file 13068_2016_572_MOESM20_ESM.pdf]

%% Main class for investigation of metaproteome data
% Name:         Start_Data_Analysis.m
% Author:       Robert Heyer
% Date :        01.06.2015
% Version:      03

function main
%% Clean everything
clc; clear all; close all;

%% Load classifications
% C.reactor, C.pH, C.tan, C.power,C.biogas, C.vfa, C.olr, C.srt, C.temp , C.fa,  C.biogasPerOlr
C  = LoadClassification();

%% Taxonomy Data
% 1. Read taxonomy data
[tax_matrix_original, TaxMatrixPlusDescription] = ReadTaxFiles();
% Sort by taxonomy profile

% 2. Remove root entry
for root = 1: size(tax_matrix_original, 1)
    if (strcmp(tax_matrix_original(root,1),  'root'))
        tax_matrix_original(root,:) = [];
        break
    end
end
clearvars root;

% 3. Contracting the length of the sample names
for entry = 2: size(tax_matrix_original, 2)
    str = cell2mat(tax_matrix_original(1, entry));
    tax_matrix_original(1, entry) = {regexprep(str,'Additional_Files_7_Taxonomic_Order_UniRef50_allSpecies_Gent','')} ;
end
clearvars str, entry;

% Remove "Unknown"-entry
for unknown = 1: size(tax_matrix_original, 1)
    if (strcmp(tax_matrix_original(unknown,1),  'unknown'))
        tax_matrix_original(unknown,:) = [];
        break;       % 'UNKNOWN" is only once in the dataset
    end
end
clearvars unknown;

% 4. Filtering and normalizing of the "tax_matrix_original" with at least
% one entry, were the taxonomy represents at least 1% of the spectra
[tax_matrix_filtered, specAverageBgp] = FilterAndNormalize(tax_matrix_original, 0.01);
% 4b. Sort after the taxTree
tax_matrix_filtered_desc = cell(size(tax_matrix_filtered,1), size(tax_matrix_filtered,2)+5);
tax_matrix_filtered_desc(:,1) = tax_matrix_filtered(:,1);
tax_matrix_filtered_desc(:,7:end) = tax_matrix_filtered(:,2:end);
%  Add description to the taxonomy matrix
for tax = 1: size(tax_matrix_filtered,1)
    for entries = 1 : size(TaxMatrixPlusDescription, 1)
        if (isequal(tax_matrix_filtered(tax,1), TaxMatrixPlusDescription(entries,1)) )
            tax_matrix_filtered_desc(tax,2) = TaxMatrixPlusDescription(entries,2); % Superkingdom
            tax_matrix_filtered_desc(tax,3) = TaxMatrixPlusDescription(entries,3); % Kingdom
            tax_matrix_filtered_desc(tax,4) = TaxMatrixPlusDescription(entries,4); % Phylum
            tax_matrix_filtered_desc(tax,5) = TaxMatrixPlusDescription(entries,5); % Class
            tax_matrix_filtered_desc(tax,6) = TaxMatrixPlusDescription(entries,6); % Order
        end
    end
end
clearvars tax entries;
tax_matrix_filtered
[tax_average_matrix_filtered]= AverageMatrix(tax_matrix_filtered);
% 5. Create the correlation matrix
[tax_correlationMatrix2, pValues] = CalculateCorrelation_V2(tax_average_matrix_filtered, tax_average_matrix_filtered);
%  Add description to the correlation matrix
tax_correlationMatrix_desc = cell(size(tax_correlationMatrix2,1), size(tax_correlationMatrix2,2)+5);
tax_correlationMatrix_desc(:,1:6) = tax_matrix_filtered_desc(:,1:6);
tax_correlationMatrix_desc(:,7:end) = tax_correlationMatrix2(:,2:end);

% 6. Perform PCA
[coeff,Scores,latent] =PerformPCA(tax_matrix_filtered, tax_matrix_filtered(1, 2:end),'Tax');
PerformPCA(tax_average_matrix_filtered, tax_average_matrix_filtered(1, 2:end),'Tax_Norm');

%%  Process data
% 1. Read process data
% rows Variables, cols: BGPs (original matrix is transposed)
[meta_matrix] = ReadMetaData();

% 3. Calculate Cross Correlations
[meta_correlationMatrix] = CalculateCorrelation_V2(meta_matrix, meta_matrix);

%% Biological function Ontology

% 1. Read biological functions
[onto_matrix_original] = ReadBiolFunctFiles();

% 2. Shorten the entry in the type list
for entry = 2: size(onto_matrix_original, 2)
    str = cell2mat(onto_matrix_original(1, entry));
    onto_matrix_original(1, entry) = {regexprep(str,'Additional_Files_7_Gent_Biological_Process_UniRef50_allSpecies_Gent','')} ;
end
clearvars str, entry;

% 3. Filter and normalize the onto_matrix
[onto_matrix_filtered] = FilterAndNormalize(onto_matrix_original, 0.01);

% 4. Create average matrix
[onto_average_matrix_filtered]= AverageMatrix(onto_matrix_filtered);

% 5. The correlation matrix
[ onto_correlationMatrix2 ] = CalculateCorrelation_V2(onto_average_matrix_filtered, onto_average_matrix_filtered);

% 6. Perform PCA
[coeff,Scores,latent]= PerformPCA(onto_matrix_filtered, onto_matrix_filtered(1, 2:end),'Biological_Process');
PerformPCA(onto_average_matrix_filtered, onto_average_matrix_filtered(1, 2:end),'Biological_Process');

%% Metaprotein Data

% 1. Read metaprotein data
[mp_matrix_original, MatrixPlusDescription] = ReadMetaProteinFiles();

% 2. Shorten the entry in the type list and shorten the identifier
for entry = 2: size(mp_matrix_original, 2)
    str = cell2mat(mp_matrix_original(1, entry));
    mp_matrix_original(1, entry) = {regexprep(str,'Additional_Files_7_Gent_Metaproteins_UniRef50_allSpecies_Gent','')} ;
end
clearvars str entry;

% 3. Remove "Unknown"-entry
for unknown = 1: size(MatrixPlusDescription, 1)
    if (strcmp(MatrixPlusDescription(unknown,1),  'UNKNOWN'))
        mp_matrix_original(unknown,:) = [];
        MatrixPlusDescription(unknown,:) = [];
        break;       % 'UNKNOWN" is only once in the dataset
    end
end
clearvars unknown;

% 4. Remove "Keratin"-entries and shorten the identifier
remove = [];
for filtered = 2: size(MatrixPlusDescription, 1)
    if (isempty(strfind(cell2mat(MatrixPlusDescription(filtered,2)),'Keratin')) == false);
        remove(end+1,1) = filtered;
    end
    % Shorten the identifer by removing UniRef50_
    str = cell2mat(MatrixPlusDescription(filtered,1));
    MatrixPlusDescription(filtered,1) = {regexprep(str,'UniRef50_','')};
    mp_matrix_original(filtered,1) = {regexprep(str,'UniRef50_','')};
end
remove = sort(remove, 'descend');
for r = 1 :length(remove)
    mp_matrix_original(remove(r),:) = [];
    MatrixPlusDescription(remove(r),:) = [];
end
clearvars unknown r  remove filtered;

% 5. Filter and normalize the mp_matrix
[mp_matrix_filtered] = FilterAndNormalize(mp_matrix_original, 0.01);
mp_matrix_filtered_desc = cell(size(mp_matrix_filtered,1), size(mp_matrix_filtered,2)+14);
mp_matrix_filtered_desc(:,1) = mp_matrix_filtered(:,1);
mp_matrix_filtered_desc(:,16:end) = mp_matrix_filtered(:,2:end);

% 6. Create average matrix
[mp_average_matrix_filtered]= AverageMatrix(mp_matrix_filtered);
% Add description to the mp_average_matrix
mp_average_matrix_filtered_desc = cell(size(mp_average_matrix_filtered,1), size(mp_average_matrix_filtered,2)+14);
mp_average_matrix_filtered_desc(:,1) = mp_average_matrix_filtered(:,1);
mp_average_matrix_filtered_desc(:,16:end) = mp_average_matrix_filtered(:,2:end);
% % Add Metainformation
for mp = 2: size(mp_average_matrix_filtered,1)
    for entries = 2 : size(MatrixPlusDescription, 1)
        if (isequal(mp_average_matrix_filtered_desc(mp,1), MatrixPlusDescription(entries,1)) )
            mp_average_matrix_filtered_desc(mp,2) = MatrixPlusDescription(entries,2); % Description
            mp_average_matrix_filtered_desc(mp,3) = MatrixPlusDescription(entries,3); % Taxonomy
            mp_average_matrix_filtered_desc(mp,4) = MatrixPlusDescription(entries,4); % Superkingdom
            mp_average_matrix_filtered_desc(mp,5) = MatrixPlusDescription(entries,5); % Kingdom
            mp_average_matrix_filtered_desc(mp,6) = MatrixPlusDescription(entries,6); % Phylum
            mp_average_matrix_filtered_desc(mp,7) = MatrixPlusDescription(entries,7); % Class
            mp_average_matrix_filtered_desc(mp,8) = MatrixPlusDescription(entries,8); % Order
            mp_average_matrix_filtered_desc(mp,9) = MatrixPlusDescription(entries,9); % Familie
            mp_average_matrix_filtered_desc(mp,10) = MatrixPlusDescription(entries,10); % Genus
            mp_average_matrix_filtered_desc(mp,11) = MatrixPlusDescription(entries,11); % Species
            mp_average_matrix_filtered_desc(mp,12) = MatrixPlusDescription(entries,12); % UniRef100
            mp_average_matrix_filtered_desc(mp,13) = MatrixPlusDescription(entries,13); % UniRef90
            mp_average_matrix_filtered_desc(mp,14) = MatrixPlusDescription(entries,14); % KO
            mp_average_matrix_filtered_desc(mp,15) = MatrixPlusDescription(entries,15); % EC
        end
    end
end
clearvars mp entries;

% 7. The correlation matrix
[ mp_correlationMatrix2 ] = CalculateCorrelation_V2(mp_average_matrix_filtered, mp_average_matrix_filtered);
%  Add description to the correlation matrix
mp_correlationMatrix2_desc = cell(size(mp_correlationMatrix2,1), size(mp_correlationMatrix2,2)+14);
mp_correlationMatrix2_desc(:,1:15) = mp_average_matrix_filtered_desc(:,1:15);
mp_correlationMatrix2_desc(:,16:end) = mp_correlationMatrix2(:,2:end);

% 8. Perform PCA
[coeff,Scores,latent]=PerformPCA(mp_matrix_filtered, mp_matrix_filtered(1, 2:end),'Metaproteins_');
PerformPCA(mp_average_matrix_filtered, mp_average_matrix_filtered(1, 2:end),'Metaproteins__Norm');

% Perform Clustergram
figure('Name', 'Metaproteins_:Clustergram');
clustergram(zscore(cell2mat(mp_matrix_filtered(2:end, 2:end))),  'RowLabels', mp_matrix_filtered(2:end,1),'ColumnLabels', mp_matrix_filtered(1,2:end),'Colormap',redbluecmap);

% 9. with bootstraps to gain p-values
% http://www.mathworks.com/matlabcentral/fileexchange/45222-hierarchical-cluster-comparison
% clustergram pdist euclidean
% linkage: average
X = zscore(cell2mat(mp_matrix_filtered(2:end,2:end)));
Y = pdist(X','euclidean');
L= linkage(Y,'average');
[H,t,perm]          = dendrogram(L,0,'LABELS',mp_matrix_filtered(1,2:end),'COLORTHRESHOLD',12,'Orientation','left');

% proposed clusters(2,4,14,20)
clusters = [1,1,1,1,1,1,...
    2,2,2,2,2,2,2,2,2,2,2,2,...
    3,3,3,3,3,3,3,3,3,3,3,3,...
    3,3,3,3,3,3,3,3,3,3,3,3,...
    3,3,3,3,3,3,3,3,3,3,3,3,...
    3,3,3,3,3,3,...
    4,4,4,4,4,4,4,4,4,4,4,4,...
    4,4,4,4,4,4,4,4,4,4,4,4,...
    4,4,4,4,4,4,4,4,4,4,4,4,...
    4,4,4,4,4,4,4,4,4,4,4,4,...
    4,4,4,4,4,4,4,4,4,4,4,4];
disp('calculation of pvalue for the clustering');
[ B, BZ, pvalue ] = PermTest_cluster_comparison(X', clusters, 1000,'average','euclidean')


%% Perform mixed correlations necessary that both matrixes has the same number of entries
% Metadata
[meta_taxo_correlationMatrix ] = CalculateCorrelation_V2(meta_matrix, tax_average_matrix_filtered);
[meta_onto_correlationMatrix ] = CalculateCorrelation_V2(meta_matrix, onto_average_matrix_filtered);
[meta_mp_correlationMatrix ] = CalculateCorrelation_V2(meta_matrix, mp_average_matrix_filtered);
% Taxodata
[taxo_meta_correlationMatrix ] = CalculateCorrelation_V2(tax_average_matrix_filtered, meta_matrix);
[taxo_onto_correlationMatrix ] = CalculateCorrelation_V2(tax_average_matrix_filtered, onto_average_matrix_filtered);
[taxo_mp_correlationMatrix ] = CalculateCorrelation_V2(tax_average_matrix_filtered, mp_average_matrix_filtered);

% Ontodata
[onto_meta_correlationMatrix] = CalculateCorrelation_V2(onto_average_matrix_filtered,meta_matrix );
[onto_taxo_correlationMatrix ] = CalculateCorrelation_V2(onto_average_matrix_filtered,tax_average_matrix_filtered );
[onto_mp_correlationMatrix ] = CalculateCorrelation_V2(onto_average_matrix_filtered, mp_average_matrix_filtered);

% MPdata
[mp_meta_correlationMatrix ] = CalculateCorrelation_V2(mp_average_matrix_filtered,meta_matrix );
[mp_taxo_correlationMatrix ] = CalculateCorrelation_V2(mp_average_matrix_filtered,tax_average_matrix_filtered );
[mp_onto_correlationMatrix ] = CalculateCorrelation_V2(mp_average_matrix_filtered, onto_average_matrix_filtered);

%% FINISH
disp('Finish')
end
%% Main class for investigation of metaproteome data
% Name:         LoadClassifications.m
% Author:       Robert Heyer
% Output:       srt,olr,reactor,fa,temp
% Date :        21.04.2015
% Version:      01
%% main
%C.reactor, C.pH, C.tan, C.power,C.biogas, C.vfa, C.olr, C.srt, C.temp , C.fa,  C.biogasPerOlr
function [C] = LoadClassification()

%% Load reactor type
C.reactor = {'C_Gent 01';
    'C_Gent 02';
    'C_Gent 03';
    'C_Gent 04';
    'C_Gent 05';
    'C_Gent 06';
    'C_Gent 07';
    'C_Gent 08';
    'C_Gent 09';
    'C_Gent 10';
    'C_Gent 11';
    'C_Gent 12';
    'C_Gent 13';
    'C_Gent 14';
    'C_Gent 15';
    'U_Gent 16';
    'U_Gent 17';
    'C_Gent 18';
    'C_Gent 19';
    'C_Gent 20';
    'C_Gent 21';
    'C_Gent 22';
    'C_Gent 23';
    'C_Gent 24';
    'C_Gent 25';
    'C_Gent 26';
    'C_Gent 27';
    'C_Gent 28';
    'C_Gent 29';
    'C_Gent 30';
    'C_Gent 31';
    'C_Gent 32';
    'C_Gent 33';
    'C_Gent 34';
    'C_Gent 35';
    'U_Gent 36';
    'C_Gent 37';
    'C_Gent 38';
    'C_Gent 39';
    'U_Gent 40'};

%% Load pH
C.pH = {'+_Gent 01';
    '+_Gent 02';
    '+_Gent 03';
    '+_Gent 04';
    '+_Gent 05';
    'uGent 06';
    'uGent 07';
    'uGent 08';
    'uGent 09';
    '+_Gent 10';
    '+_Gent 11';
    '+_Gent 12';
    '+_Gent 13';
    '+_Gent 14';
    '+_Gent 15';
    '-_Gent 16';
    '-_Gent 17';
    '+_Gent 18';
    '-_Gent 19';
    '+_Gent 20';
    '+_Gent 21';
    '+_Gent 22';
    '-_Gent 23';
    '+_Gent 24';
    '+_Gent 25';
    '+_Gent 26';
    '-_Gent 27';
    '-_Gent 28';
    '+_Gent 29';
    '+_Gent 30';
    '-_Gent 31';
    '+_Gent 32';
    '+_Gent 33';
    '-_Gent 34';
    '-_Gent 35';
    '-_Gent 36';
    '+_Gent 37';
    '+_Gent 38';
    '+_Gent 39';
    '-_Gent 40'};

%% Load TAN
C.tan = {'-_Gent 01';
    '-_Gent 02';
    '-_Gent 03';
    '-_Gent 04';
    '-_Gent 05';
    '-_Gent 06';
    '-_Gent 07';
    '-_Gent 08';
    '-_Gent 09';
    '-_Gent 10';
    '-_Gent 11';
    '-_Gent 12';
    '-_Gent 13';
    '-_Gent 14';
    '+_Gent 15';
    '-_Gent 16';
    '-_Gent 17';
    '-_Gent 18';
    '-_Gent 19';
    '-_Gent 20';
    '-_Gent 21';
    '-_Gent 22';
    '-_Gent 23';
    '-_Gent 24';
    '-_Gent 25';
    '+_Gent 26';
    '-_Gent 27';
    '-_Gent 28';
    '+_Gent 29';
    '-_Gent 30';
    '+_Gent 31';
    '+_Gent 32';
    '-_Gent 33';
    '-_Gent 34';
    '-_Gent 35';
    '-_Gent 36';
    '-_Gent 37';
    '+_Gent 38';
    '-_Gent 39';
    '-_Gent 40'};

%% Load power
C.power = {'u_Gent 01';
    'u_Gent 02';
    'u_Gent 03';
    'u_Gent 04';
    'u_Gent 05';
    'u_Gent 06';
    'u_Gent 07';
    'u_Gent 08';
    'u_Gent 09';
    'u_Gent 10';
    'u_Gent 11';
    'u_Gent 12';
    'u_Gent 13';
    'u_Gent 14';
    '+_Gent 15';
    'u_Gent 16';
    '-_Gent 17';
    '+_Gent 18';
    'u_Gent 19';
    '-_Gent 20';
    '+_Gent 21';
    '-_Gent 22';
    '+_Gent 23';
    '-_Gent 24';
    '-_Gent 25';
    '+_Gent 26';
    'u_Gent 27';
    '-_Gent 28';
    '+_Gent 29';
    '+_Gent 30';
    '+_Gent 31';
    '-_Gent 32';
    '-_Gent 33';
    'u_Gent 34';
    '-_Gent 35';
    'u_Gent 36';
    'u_Gent 37';
    'u_Gent 38';
    '-_Gent 39';
    'u_Gent 40'};

%% Load biogas
C.biogas = {'+_Gent 01';
    '+_Gent 02';
    '+_Gent 03';
    '-_Gent 04';
    '-_Gent 05';
    '+_Gent 06';
    '+_Gent 07';
    '+_Gent 08';
    '-_Gent 09';
    '-_Gent 10';
    '-_Gent 11';
    '-_Gent 12';
    '-_Gent 13';
    '+_Gent 14';
    '+_Gent 15';
    '-_Gent 16';
    'u_Gent 17';
    '+_Gent 18';
    '-_Gent 19';
    '+_Gent 20';
    '+_Gent 21';
    '-_Gent 22';
    '-_Gent 23';
    '-_Gent 24';
    '+_Gent 25';
    '+_Gent 26';
    '+_Gent 27';
    '+_Gent 28';
    '+_Gent 29';
    '+_Gent 30';
    '+_Gent 31';
    '-_Gent 32';
    '-_Gent 33';
    '-_Gent 34';
    '-_Gent 35';
    'u_Gent 36';
    'u_Gent 37';
    'u_Gent 38';
    '-_Gent 39';
    '-_Gent 40'};

%% Load VFA
C.vfa = {'u_Gent 01';
    '-_Gent 02';
    'u_Gent 03';
    '+_Gent 04';
    'u_Gent 05';
    '+_Gent 06';
    '-_Gent 07';
    'u_Gent 08';
    '+_Gent 09';
    'u_Gent 10';
    'u_Gent 11';
    '-_Gent 12';
    'u_Gent 13';
    '-_Gent 14';
    '+_Gent 15';
    '-_Gent 16';
    '-_Gent 17';
    '+_Gent 18';
    '-_Gent 19';
    '+_Gent 20';
    '-_Gent 21';
    '+_Gent 22';
    '+_Gent 23';
    '+_Gent 24';
    '+_Gent 25';
    '-_Gent 26';
    '+_Gent 27';
    '+_Gent 28';
    '-_Gent 29';
    '-_Gent 30';
    '+_Gent 31';
    '-_Gent 32';
    '+_Gent 33';
    '-_Gent 34';
    '+_Gent 35';
    '-_Gent 36';
    '-_Gent 37';
    '+_Gent 38';
    '+_Gent 39';
    '-_Gent 40'};

%% Load OLR
C.olr = {'+Gent 01';
    '+Gent 02';
    '+Gent 03';
    '+Gent 04';
    '+Gent 05';
    '+Gent 06';
    '+Gent 07';
    '+Gent 08';
    '+Gent 09';
    '+Gent 10';
    '+Gent 11';
    '+Gent 12';
    '+Gent 13';
    '+Gent 14';
    '-Gent 15';
    '-Gent 16';
    'uGent 17';
    'uGent 18';
    '-Gent 19';
    '+Gent 20';
    '-Gent 21';
    '-Gent 22';
    '-Gent 23';
    '-Gent 24';
    '+Gent 25';
    '-Gent 26';
    '+Gent 27';
    '-Gent 28';
    '-Gent 29';
    '-Gent 30';
    '+Gent 31';
    '-Gent 32';
    '-Gent 33';
    '-Gent 34';
    '+Gent 35';
    'uGent 36';
    'uGent 37';
    'uGent 38';
    '-Gent 39';
    '+Gent 40'};

%% Load srt
C.srt = {'-_Gent 01';
    '-_Gent 02';
    '-_Gent 03';
    '-_Gent 04';
    '+_Gent 05';
    '+_Gent 06';
    '+_Gent 07';
    '-_Gent 08';
    '-_Gent 09';
    '+_Gent 10';
    '+_Gent 11';
    '-_Gent 12';
    '+_Gent 13';
    '+_Gent 14';
    '+_Gent 15';
    '1_Gent 16';
    'u_Gent 17';
    '+_Gent 18';
    '-_Gent 19';
    '-_Gent 20';
    '+_Gent 21';
    '+_Gent 22';
    '+_Gent 23';
    '+_Gent 24';
    '-_Gent 25';
    '+_Gent 26';
    '+_Gent 27';
    '-_Gent 28';
    '+_Gent 29';
    '+_Gent 30';
    '+_Gent 31';
    '+_Gent 32';
    '+_Gent 33';
    '-_Gent 34';
    '+_Gent 35';
    'u_Gent 36';
    'u_Gent 37';
    'u_Gent 38';
    '+_Gent 39';
    '1_Gent 40'};

%% Load temperature
C.temp = {'T_Gent 01';
    'T_Gent 02';
    'M_Gent 03';
    'T_Gent 04';
    'T_Gent 05';
    'T_Gent 06';
    'T_Gent 07';
    'T_Gent 08';
    'M_Gent 09';
    'T_Gent 10';
    'T_Gent 11';
    'T_Gent 12';
    'T_Gent 13';
    'T_Gent 14';
    'M_Gent 15';
    'M_Gent 16';
    'M_Gent 17';
    'M_Gent 18';
    'M_Gent 19';
    'T_Gent 20';
    'M_Gent 21';
    'M_Gent 22';
    'T_Gent 23';
    'M_Gent 24';
    'T_Gent 25';
    'M_Gent 26';
    'T_Gent 27';
    'T_Gent 28';
    'M_Gent 29';
    'M_Gent 30';
    'M_Gent 31';
    'M_Gent 32';
    'M_Gent 33';
    'M_Gent 34';
    'T_Gent 35';
    'M_Gent 36';
    'M_Gent 37';
    'M_Gent 38';
    'M_Gent 39';
    'M_Gent 40'};

%% Load free ammonia
C.fa = {'+_Gent 01';
    '+_Gent 02';
    '+_Gent 03';
    '+_Gent 04';
    '+_Gent 05';
    'uGent 06';
    'uGent 07';
    'uGent 08';
    'uGent 09';
    '+_Gent 10';
    '+_Gent 11';
    '+_Gent 12';
    '+_Gent 13';
    '+_Gent 14';
    '+_Gent 15';
    '-_Gent 16';
    '-_Gent 17';
    '+_Gent 18';
    '-_Gent 19';
    '+_Gent 20';
    '+_Gent 21';
    '+_Gent 22';
    '+_Gent 23';
    '+_Gent 24';
    '+_Gent 25';
    '+_Gent 26';
    'u_Gent 27';
    '+_Gent 28';
    '+_Gent 29';
    '+_Gent 30';
    '+_Gent 31';
    '+_Gent 32';
    '+_Gent 33';
    '-_Gent 34';
    '+_Gent 35';
    '-_Gent 36';
    '+_Gent 37';
    '+_Gent 38';
    '+_Gent 39';
    '-_Gent 40'};

%% Load biogas/olr
C.biogasPerOlr ={'-_Gent 01';
    '-_Gent 02';
    '-_Gent 03';
    '-_Gent 04';
    '-_Gent 05';
    '+Gent 06';
    '+Gent 07';
    '+Gent 08';
    '-Gent 09';
    '-_Gent 10';
    '-_Gent 11';
    '-_Gent 12';
    '-_Gent 13';
    '-_Gent 14';
    '+_Gent 15';
    '-_Gent 16';
    'u_Gent 17';
    'u_Gent 18';
    '+_Gent 19';
    '-_Gent 20';
    '+_Gent 21';
    '-_Gent 22';
    '-_Gent 23';
    '-_Gent 24';
    '-_Gent 25';
    '+_Gent 26';
    '+_Gent 27';
    '+_Gent 28';
    '+_Gent 29';
    '+_Gent 30';
    '+_Gent 31';
    '-_Gent 32';
    '+_Gent 33';
    '-_Gent 34';
    '-_Gent 35';
    'u_Gent 36';
    'u_Gent 37';
    'u_Gent 38';
    '+_Gent 39';
    '-_Gent 40'};
end

%% Reads the tax files
% Name:         ReadTaxFiles.m
% Author:       Robert Heyer
% Date :        29.04.2015
% Version:      02
% Input:        []
% Output 1:     matrix, containing the values, the variables(rows) and
%               samples (columns)
%**************************************************************************

function [matrix, MatrixPlusDescription] = ReadTaxFiles()


%% Get files
[FILES.fileName, FILES.pathName] = uigetfile('../*.csv', 'Read taxonomy.-files', 'MultiSelect', 'on');
% If only one .csv-file is selected, update variable type
if iscell(FILES.fileName) ~=1
    FILES.fileName={FILES.fileName};
end

%% Import data
typeList = cell (0,6);
% Get type entries
for i = 1 : length(FILES.fileName)
    delimiter = '\t';
    startRow = 1;
    % Format string for each line of text: % column1: text (%s); % column2: double (%f)
    formatSpec = '%s%s%s%s%s%s%f%[^\n\r]';
    % Open the text file.
    fileID = fopen([FILES.pathName, cell2mat(FILES.fileName(i))],'r');
    % Read columns of data according to format string.
    dataArray = textscan(fileID, formatSpec, 'Delimiter', delimiter, 'HeaderLines' ,startRow-1, 'ReturnOnError', false);
    % Close the text file.
    fclose(fileID);
    % Create output variable
    dataArray([7]) = cellfun(@(x) num2cell(x), dataArray([7]), 'UniformOutput', false);
    data = [dataArray{1:end-1}];
    
    % Create Matrix of non-redundant entries
    for j = 1 : size(data,1)
        len = 0;
        addElement = true;
        while (len < size(typeList,1) )
            len = len+1;
            if (isequal(typeList(len,1), data(j,1)))                       % Check wehther already in type list, Uniref 50 is in data column 7
                addElement = false;
            end
        end
        if(addElement)
            typeList(end +1, 1) = data(j,1);                                % Add order
            typeList(end, 2)    = data(j,2);                                  % Add superkingdom
            typeList(end, 3)    = data(j,3);                                  % Add kingdom
            typeList(end, 4)    = data(j,4);                                  % Add phylum
            typeList(end, 5)    = data(j,5);                                  % Add class
            typeList(end, 6)    = data(j,6);                                  % Add order
            
        end
    end
    % SYSO
    fprintf(['IMPORTED: '  cell2mat(FILES.fileName(i)) '\n']);
end

% Get data matrix
matrix = zeros(size(typeList,1) + 1, length(FILES.fileName) + 6);          % Define empty matrix
matrix = num2cell(matrix);                                                 % Transform matrix to nums
% Set row names (variables)
% typeList = sort(typeList);                                                 % Sort alphabetically
for r = 1 : size(typeList,1)
    matrix(r+1, 1:6) = typeList(r,1:6);
end
clearvars r;
% Set column names (samples)
for c = 1 : length(FILES.fileName)
    matrix(1, c+6) = FILES.fileName(1,c);
end
clearvars c;


% Fill the matrix
for i = 1 : length(FILES.fileName)
    delimiter = '\t';
    startRow = 1;
    % Format string for each line of text: % column1: text (%s); % column2: double (%f)
    formatSpec = '%s%s%s%s%s%s%f%[^\n\r]';
    % Open the text file.
    fileID = fopen([FILES.pathName, cell2mat(FILES.fileName(i))],'r');
    % Read columns of data according to format string.
    dataArray = textscan(fileID, formatSpec, 'Delimiter', delimiter, 'HeaderLines' ,startRow-1, 'ReturnOnError', false);
    % Close the text file.
    fclose(fileID);
    % Create output variable
    dataArray([7]) = cellfun(@(x) num2cell(x), dataArray([7]), 'UniformOutput', false);
    data = [dataArray{1:end-1}];
    
    % Create Matrix of non-redundant entries
    for j = 1 : size(data,1)
        % Check with each entry into the matrix
        for m = 2 : size(matrix,1)
            if(isequal(data(j,1), matrix(m,1)))
                matrix(m,i+6) = data(j,7);
            end
        end
    end
    % SYSO
    fprintf(['READ: '  cell2mat(FILES.fileName(i)) '\n']);
end
clearvars tax entries;
% Sort the matrix
matrixB = cell(size(matrix,1),size(matrix,2));
matrixB(1,:) = matrix(1,:);
matrixB(2:end,1:end) = sortrows(matrix(2:end, 1:end), [2 3 4 5 6]);
matrix =matrixB;
clearvars tax_matrix_filtered_descB;

MatrixPlusDescription = matrix;
% Remove description columns
matrix(:,6) = [];
matrix(:,5) = [];
matrix(:,4) = [];
matrix(:,3) = [];
matrix(:,2) = [];

fprintf(['Taxonomy files successfully read: \n']);
end

%% Filter and normalize the matrix
% Name:         ReadTaxFiles.m
% Description:   Filter the Matrix to the threshold (one sample with at least the threshold)
%               and normalize the matrix to the spectral count of the sample
% Author:       Robert Heyer
% Date :        25.02.2015
% Version:      01
% Input 1:      [matrix (rows: variables; cols: samples)]
% Input 2:      cutOff
% Output 1:     The filtered matrix
%**************************************************************************

function [matrix_filtered,specAverageBgp] = FilterAndNormalize(matrix, cutOff)

%% Normalize the matrix to the number of spectra of each sample
matrix_filtered     = cell(size(matrix));                                  % Create matrix for the results
specAverageBgp      = sum(cell2mat(matrix(2:end, 2:end)),1);               % Sum of spectra for each sample (BGP)
matrix_filtered(1, :) = matrix(1,:);
matrix_filtered(:, 1) = matrix(:,1);
for cols = 2 : size(matrix, 2)                                             % Each sample BGP
    for rows = 2: size(matrix, 1)                                          % Each varariable
        matrix_filtered(rows, cols) = {cell2mat( matrix(rows, cols))/...
            specAverageBgp(cols-1)};     % Normalize each entry
    end
end

%% FILTERING
remove = [];                                                               % Columns to remove
% Get rows of tax, onto or MP to remove
for row = 2 : size(matrix_filtered,1)                                      % Check each row (tax, onto, mp)
    threshold = false;                                                     % variable above treshold
    for col = 2 : size(matrix_filtered,2)                                  % Check each BGP
        if( cell2mat(matrix_filtered(row, col)) >= cutOff)                 % If variable above threshold:OK
            threshold = true;
        end
    end
    if(threshold == false)                                                 % If variable below threshold remember for deleting
        remove(end + 1) = row;
    end
end
remove = sort(remove, 'descend');                                          % Start removal with the biggest entry
for r = 1 : length(remove)
    matrix_filtered(remove(r),:) = [];
end
fprintf('Matrix was normalized and filtered by threshold %g successfully \n', cutOff);
end

%% Creates the average of a certain matrix with replicates
% Name:         AverageMatrix.m
% Description:   Filter the Matrix to the threshold (one sample with at least the threshold)
%               and normalize the matrix to the spectral count of the sample
% Author:       Robert Heyer
% Date :        25.02.2015
% Version:      01
% Input 1:      [matrix (rows: variables; cols: samples)]
% Output 1:     The average matrix
%**************************************************************************

function [matrix_average] = AverageMatrix(matrix)
matrix_average = cell(size(matrix,1), ((size(matrix,2)-1)/3)+1);% Create empty matrix for the averages
matrix_average(:,1) = matrix(:,1);                                         % Names of taxonomies remains equal
%Get cols and fill meanMatrix
for samples = 2 : (((size(matrix,2)-1)/3)+1)                               % Take only each third col beginning by col 2
    col = ((samples-1)*3)-1;                                               % col of "a" of each sample in matrix
    matrix_average(1, samples) = matrix(1, col);                            % Copy tax name into the mean table
    for row = 2 : size(matrix,1)                                           % fill each entry for the current sample
        matrix_average(row, samples) = {(cell2mat(matrix(row,col)) + ...
            cell2mat(matrix(row,col+1)) + ...
            cell2mat(matrix(row,col+2)))/3}; % Fill with average
    end
end
end

%% Creates the crosscorrelation matrix
% Name:         CalculateCorrelation.m
% Description:  Calculates the correlation matrix based on the Spearman
%               correlation of the rows of the matrix
%               More robust interpretation of the correlation, which
%               ignores emptz entries
% Author:       Robert Heyer
% Date :        24.03.2015
% Version:      01
% Input 1:      [matrix (rows: variables; cols: samples)]
% Output 1:     The correlation matrix
%**************************************************************************

function [ crossMatrix, pValues ] = CalculateCorrelation_V2(matrix1, matrix2)


%% Calculate Crosscorrelation matrix
crossMatrix = cell(size(matrix1,1), size(matrix2,1));
crossMatrix(:, 1) = matrix1(:,1);
crossMatrix(1, :) = matrix2(:,1)';

pValues = cell(size(matrix1,1), size(matrix2,1));
pValues(:, 1) = matrix1(:,1);
pValues(1, :) = matrix2(:,1)';

for row = 2 : size(crossMatrix, 1)
    for column = 2 : size(crossMatrix,2)
        %Ignore empty entries
        remove = [];
        x = matrix1(row,2:end)';
        y = matrix2(column,2:end)';
        % Iterate over all entries and find empty/ null entries
        for l = 1: length(x)
            if (isnan(cell2mat(x(l))) || isnan(cell2mat(y(l))) )
                remove(end+1) = l;
            end
        end
        % Remove null entries
        remove = sort(remove, 'descend');
        for r = 1: length(remove)
            x(remove(r)) = [];
            y(remove(r)) = [];
        end
        [correlation, pValue] = corr(cell2mat(x), cell2mat(y),'Type','Spearman');
        if (pValue< 0.01)
            crossMatrix(row, column) =  {correlation};
        else
            crossMatrix(row, column) =  {'NoCorr'};
        end
        pValues(row, column) = {pValue};
        
    end
end
fprintf(['CrossCorrelation with Spearman matrix successfully calculated \n']);

end

%% Perform principle component analysis
% Name:         PerformPCA.m
% Description:  Perform principal component analysis and normalize the data by Zscore and creates the plots
% Author:       Robert Heyer
% Date :        25.02.2015
% Version:      01
% Input 1:      [matrix (rows: variables; cols: samples)]
% Output 1:     coeff, PCA output.
% Output 2:     Scores, PCA output.
% Output 3:     latent, PCA output.
% Output 4:     tsquared, PCA output.
%**************************************************************************

function [ coeff,Scores,latent ] = PerformPCA( matrix, samples, nameTag)
%% Text data set
% load cities;
% SAMPLES = names; % city names (329x1)
% FIT DATA to variables and test-Dataset
% SAMPLES (city names/ BGP names)
% VARIABLE = categories; % city categories (9x1)
% VALUES = ratings; % ratings (city names(329) x categories(9))

% Fit our data to required formats
SAMPLES = samples;
% VARIABLE (categories, taxonomien, ontologien, metaproteine), (BGPs x mp,Tax )
VARIABLES =  matrix(2:end,1);
% VALUES ( rows: samples and cols : variables -- tranpose)
VALUES = cell2mat(matrix(2:end, 2:end))';

%% Calculate PCA
[coeff,Scores,latent] = pca(zscore(VALUES));

%% Plot figures
figure('Name',['3. PrinComp_' nameTag],'NumberTitle','off');
scatter(Scores(:,1),Scores(:,2));
xlabel('1st Principal Component');
ylabel('2nd Principal Component');
text(Scores(:,1), Scores(:,2), samples, 'horizontal','left', 'vertical','bottom', 'FontSize', 6);

figure('Name', ['4. Explained Variance_' nameTag]);
pareto(latent);

figure('Name', ['5. BiPlot_' nameTag]);
biplot(coeff(:,1:2),'scores',Scores(:,1:2),'varlabels',VARIABLES);


%% coloured and CLUSTERED PCA DATA
% pcclusters = clusterdata(Scores(:,1:2),6);
% gscatter(Scores(:,1),Scores(:,2),pcclusters)
end


%% Perform Clustering
% Name:         PerformClustering.m
% Description:  Perform clustering based on cityblocks
% Author:       Robert Heyer
% Date :        25.02.2015
% Version:      01
% Input 1:      [matrix (rows: variables; cols: samples)]
% Input 1:      list of samples
% Input 1:      name tag for the type of the matrix
%**************************************************************************

function PerformClustering( matrix, samples, nameTag )
%% Clustering
figure('Name', ['6. CLUSTERING' nameTag]);
Y = pdist(cell2mat(matrix)','cityblock');% 'euclidean'
L = linkage(Y);
dendrogram(L,0,'Labels',samples,'Orientation','left', 'ColorThreshold',0.45);
% Clear temporary variables
clearvars Y;clearvars L;
end

%% Reads the tax files
% Name:         ReadMetaData.m
% Author:       Robert Heyer
% Date :        25.02.2015
% Version:      01
% Input:        []
% Output 1:     matrix, containing the values, the variables(rows) and
%               samples (columns)
%**************************************************************************

function [matrix] = ReadMetaData()
[~, ~, MetaDataSetV3] = xlsread('Additional_File_7_MetaDataSet.xlsx','Tabelle1');
% MetaDataSetV3(cellfun(@(x) ~isempty(x) && isnumeric(x) && isnan(x),MetaDataSetV3)) = {''};
% MetaDataSetV3(cellfun(@(x) ~isempty(x) && isnumeric(x) ,MetaDataSetV3)) = {''};

matrix = MetaDataSetV3';
end

%% Reads the biol function ontology files
% Name:         ReadBiolFunctFiles.m
% Author:       Robert Heyer
% Date :        25.02.2015
% Version:      01
% Input:        []
% Output 1:     matrix, containing the values, the variables(rows) and
%               samples (columns)
%**************************************************************************

function [matrix] = ReadBiolFunctFiles(text)
%% Get files
[FILES.fileName, FILES.pathName] = uigetfile('../*.csv', 'Pick biologial process-files', 'MultiSelect', 'on');
% If only one .csv-file is selected, update variable type
if iscell(FILES.fileName) ~=1
    FILES.fileName={FILES.fileName};
end

%% Import data
typeList = cell (0,1);

% Get type entries
for i = 1 : length(FILES.fileName)
    delimiter = '\t';
    % Format string for each line of text: % column1: text (%s); % column2: double (%f)
    formatSpec = '%s%f%[^\n\r]';
    % Open the text file.
    fileID = fopen([FILES.pathName, cell2mat(FILES.fileName(i))],'r');
    % Read columns of data according to format string.
    dataArray = textscan(fileID, formatSpec, 'Delimiter', delimiter,  'ReturnOnError', false);
    % Close the text file.
    fclose(fileID);
    % Create output variable
    dataArray(2) = cellfun(@(x) num2cell(x), dataArray(2), 'UniformOutput', false);
    data = [dataArray{1:end-1}];
    
    % Create List of non-redundant entries
    for j = 1 : size(data,1)
        len = 0;
        addElement = true;
        while (len < size(typeList,1) )
            len = len+1;
            if (isequal(typeList(len,1), data(j,1)))                       % Check wehther already in type list
                addElement = false;
            end
        end
        if(addElement)
            typeList(end +1, 1) = data(j,1);                               % Add unique variables to the type list
        end
    end
    
    % SYSO
    fprintf(['IMPORTED: '  cell2mat(FILES.fileName(i)) '\n']);
    
    % Clear temporary variables
    clearvars filename delimiter formatSpec fileID dataArray ans addElement len j i;
end

% Get data matrix
matrix = zeros(size(typeList,1) + 1, length(FILES.fileName) + 1);          % Define empty matrix
matrix = num2cell(matrix);                                                 % Transform matrix to nums
% Set row names (variables)
typeList = sort(typeList);                                                 % Sort alphabetically
for r = 1 : length(typeList)
    matrix(r+1, 1) = typeList(r,1);
end
clearvars r;
% Set column names (samples)
for c = 1 : length(FILES.fileName)
    matrix(1, c+1) = FILES.fileName(1,c);
end
clearvars c;

for i = 1 : length(FILES.fileName)                                         % Fill matrix with spectral count values
    delimiter = '\t';
    % Format string for each line of text: % column1: text (%s); % column2: double (%f)
    formatSpec = '%s%f%[^\n\r]';
    % Open the text file.
    fileID = fopen([FILES.pathName, cell2mat(FILES.fileName(i))],'r');
    % Read columns of data according to format string.
    dataArray = textscan(fileID, formatSpec, 'Delimiter', delimiter,  'ReturnOnError', false);
    % Close the text file.
    fclose(fileID);
    % Create output variable
    dataArray(2) = cellfun(@(x) num2cell(x), dataArray(2), 'UniformOutput', false);
    data = [dataArray{1:end-1}];
    % Take every entry
    for j = 1 : size(data,1)
        % Check with each entry into the matrix
        for m = 2 : size(matrix,1)
            if(isequal(data(j,1), matrix(m,1)))
                matrix(m,i+1) = data(j,2);
            end
        end
    end
end
fprintf(['Ontology files successfully read: \n']);
end

%% Reads the tax files
% Name:         ReadTaxFiles.m
% Author:       Robert Heyer
% Date :        25.02.2015
% Version:      01
% Input:        []
% Output 1:     matrix, containing the values, the variables(rows) and
%               samples (columns)
%**************************************************************************

function [matrix, MatrixPlusDescription] = ReadMetaProteinFiles()
%% Get files
[FILES.fileName, FILES.pathName] = uigetfile('../*.csv', 'Read metaprotein.-files', 'MultiSelect', 'on');
% If only one .csv-file is selected, update variable type
if iscell(FILES.fileName) ~=1
    FILES.fileName={FILES.fileName};
end

%% Import data
typeList = cell (0,7);

% Get type entries
for i = 1 : length(FILES.fileName)
    delimiter = '\t';
    startRow = 2;
    % Format string for each line of text: % column1: text (%s); % column2: double (%f)
    formatSpec = '%s%s%s%s%s%s%s%s%s%s%s%s%s%s%s%s%s%f%f%s%s%[^\n\r]';
    % Open the text file.
    fileID = fopen([FILES.pathName, cell2mat(FILES.fileName(i))],'r');
    % Read columns of data according to format string.
    dataArray = textscan(fileID, formatSpec, 'Delimiter', delimiter, 'HeaderLines' ,startRow-1, 'ReturnOnError', false);
    % Close the text file.
    fclose(fileID);
    % Create output variable
    dataArray([18, 19]) = cellfun(@(x) num2cell(x), dataArray([18, 19]), 'UniformOutput', false);
    data = [dataArray{1:end-1}];
    
    % Create Matrix of non-redundant entries
    for j = 1 : size(data,1)
        len = 0;
        addElement = true;
        while (len < size(typeList,1) )
            len = len+1;
            if (isequal(typeList(len,1), data(j,15)))                       % Check wehther already in type list, Uniref 50 is in data column 7
                addElement = false;
            end
        end
        if(addElement)
            typeList(end +1, 1) = data(j,15);                               % Add unique uniRef50 to the type list
            typeList(end, 2)    = data(j,3);                                  % Add description
            typeList(end, 3)    = data(j,4);                                  % Add taxonomy
            typeList(end, 4)    = data(j,5);                                  % Add superkingdom
            typeList(end, 5)    = data(j,6);                                  % Add kingdom
            typeList(end, 6)    = data(j,7);                                  % Add phylum
            typeList(end, 7)    = data(j,8);                                  % Add order
            typeList(end, 8)    = data(j,9);                                  % Add class
            typeList(end, 9)    = data(j,10);                                 % Add familie
            typeList(end, 10)   = data(j,11);                                 % Add genus
            typeList(end, 11)   = data(j,12);                                 % Add species
            typeList(end, 12)    = data(j,13);                                % Add UniRef100
            typeList(end, 13)    = data(j,14);                                % Add UniRef90
            typeList(end, 14)    = data(j,16);                                % Add KO
            typeList(end, 15)    = data(j,17);                                % Add EC
        end
    end
    % SYSO
    fprintf(['IMPORTED: '  cell2mat(FILES.fileName(i)) '\n']);
end

% Get data matrix
matrix = zeros(size(typeList,1) + 1, length(FILES.fileName) + 15);          % Define empty matrix
matrix = num2cell(matrix);                                                 % Transform matrix to nums
% Set row names (variables)
% typeList = sort(typeList);                                                 % Sort alphabetically
for r = 1 : size(typeList,1)
    matrix(r+1, 1:15) = typeList(r,1:15);
end
clearvars r;
% Set column names (samples)
for c = 1 : length(FILES.fileName)
    matrix(1, c+15) = FILES.fileName(1,c);
end
clearvars c;


% Fill the matrix
for i = 1 : length(FILES.fileName)
    delimiter = '\t';
    startRow = 2;
    % Format string for each line of text: % column1: text (%s); % column2: double (%f)
    formatSpec = '%s%s%s%s%s%s%s%s%s%s%s%s%s%s%s%s%s%f%f%s%s%[^\n\r]';
    % Open the text file.
    fileID = fopen([FILES.pathName, cell2mat(FILES.fileName(i))],'r');
    % Read columns of data according to format string.
    dataArray = textscan(fileID, formatSpec, 'Delimiter', delimiter, 'HeaderLines' ,startRow-1, 'ReturnOnError', false);
    % Close the text file.
    fclose(fileID);
    % Create output variable
    dataArray([18, 19]) = cellfun(@(x) num2cell(x), dataArray([18, 19]), 'UniformOutput', false);
    data = [dataArray{1:end-1}];
    for j = 1 : size(data,1)
        % Check with each entry into the matrix
        for m = 2 : size(matrix,1)
            if(isequal(data(j,15), matrix(m,1)))
                matrix(m,i+15) = data(j,19);
            end
        end
    end
    
    % SYSO
    fprintf(['READ: '  cell2mat(FILES.fileName(i)) '\n']);
end
% Sort the matrix
matrixB = cell(size(matrix,1),size(matrix,2));
matrixB(1,:) = matrix(1,:);
matrixB(2:end,1:end) = sortrows(matrix(2:end, 1:end), [4 5 6 7 8 9 10 11]);
matrix =matrixB;
clearvars tax_matrix_filtered_descB;

MatrixPlusDescription = matrix;

% Remove description columns
matrix(:,15) = [];
matrix(:,14) = [];
matrix(:,13) = [];
matrix(:,12) = [];
matrix(:,11) = [];
matrix(:,10) = [];
matrix(:,9) = [];
matrix(:,8) = [];
matrix(:,7) = [];
matrix(:,6) = [];
matrix(:,5) = [];
matrix(:,4) = [];
matrix(:,3) = [];
matrix(:,2) = [];

fprintf(['MetaProtein files successfully read: \n']);
end

function [ B, BZ, pvalue ] = PermTest_cluster_comparison( X,C,K,link,metric)

% [ B, BZ, pvalue ] = PermTest_cluster_comparison( X,C,K,link,metric)
%
%
% The function performs the permutation test on comparison measure B between two hierarchical
% partitions proposed in the paper:
% A Method for Comparing Two Hierarchical Clusterings, E. B. Fowlkes and C. L. Mallows
% JASA, 1983.
%
% Null Hypothesis of the test is: The two hierarchical partitions (C and
% CZ) are completly uncorrelated, in other word, are completly different.
%
% Alternative Hypothesis is: The two hierarchical partitions are
% correlated, in other word, have significant similarity.
%
% 
% INPUT:
% X is the original data matrix (N units x P variables)
% C is the vectors of clusters, arbitrarily labeled, obtained by theoretical assumption
%       (C represents the partition of the N objects under the Null
%       Hypothesis)
% K is a scalar indicating the number of permutations 
% link is a string indicating the method for hierarchical clustering (see
%           matlab built-in LINKAGE function help) 
%           i.e. link='average'
% metric is a string indicating the metric for hierarchical clustering (see
%           matlab built-in LINKAGE function help)
%           i.e. metric='jaccard'
%
% OUTPUT:
% B is a vector of B measures calculated on each permutated sample
% BZ is the B measure calculated among clustering on original data matrix and clustering C under null hypothesis 
% pvalue is the P-value of B measure (on original matrix) calculated by permutation test.

[n,p]=size(X);

maxC=length(unique(C));

%% cluster comparison between original matrix and null hypothesis

    Z=linkage(X,'average','jaccard');
    
    CZ(:,1)=cluster(Z,'maxclust',maxC);  % CZ is the partition obtained on original data
    
    [ BZ ] = clustering_comparison( CZ,C );


%% Permutation test
for k=1:K
    
    K_index=randperm(n);

    Xb=X(K_index,:);
    
    Zb=linkage(Xb,'average','jaccard');
    
    Cb(:,k)=cluster(Zb,'maxclust',maxC);
    
    [ B(k,1) ] = clustering_comparison( Cb(:,k),C );
    
end

%% Pvalue Calculation of BZ

pvalue=sum(B>BZ)/length(B);


end

function [ B ] = clustering_comparison( C1,C2 )
% [ B ] = Hclustering_comparison( C1,C2 )
%
% The function calculates the comparison measure B between two hierarchical
% partitions proposed in the paper:
% A Method for Comparing Two Hierarchical Clusterings, E. B. Fowlkes and C. L. Mallows
% JASA, 1983.
%
% INPUT:
% C1 and C2 are the vectors of clusters, arbitrarily labeled, obtained in
% two different hierarchical clustering analysis on the same observations.

% OUTPUT:
% B is the similarity index proposed.
% B=1 perfect matching between the two partitions
% B=0 no matching between the two partitions

M=crosstab(C1,C2);
Mi=sum(M,2);
Mj=sum(M,1);
n=sum(M(:));

T=sum(M(:).^2)-n;

P=sum(Mi(:).^2)-n;

Q=sum(Mj(:).^2)-n;

B= T/sqrt(P*Q);


end
