# Supplementary material for: Proteotyping of biogas plant microbiomes separates biogas plants according to process temperature and reactor type
Source: Biotechnol Biofuels. 2016 Jul 26;9:155. doi: 10.1186/s13068-016-0572-4 (PMC4960849; doi:10.1186/s13068-016-0572-4)
Supplement: Supplementary file 21 — 10.1186/s13068-016-0572-4 Analogous, decision tree learning can be execute by running the file “Additional_File_21_Start_DecissionTrees.m” and selecting the desired taxonomy matrix (“Additional_Files_21_Taxonomic_Order_Learning”), biological process matrix (“Additional_Files_21_Biological_Processes_Learning”) or metaprotein matrix (“Additional_Files_21_Metaprotein_Learning”). [file 13068_2016_572_MOESM21_ESM.pdf]

%% Try Learning Algorithms
clc; clear all; close all;
%% Define parameters
noMeasurementsX = 23;
% Metaprotein Matrix: 21
% Biological Process Matrix: 21
% Taxonomic order Matrix: 23


%% Get Input matrix
[FILES.fileName, FILES.pathName]  = uigetfile('../*.csv', 'ReadLearningMatrix.-files', 'MultiSelect', 'off');
data                              = importdata([FILES.pathName FILES.fileName]);%'C:\Users\Biogas01\Desktop\CorrelationMatrix4Gephi.csv');
matrix                            = data.data;
matrixHeaders                     = data.textdata;
learningMatrix                       = cell(size(matrixHeaders,1), size(matrixHeaders,2) );
learningMatrix(1, 1:end)             = matrixHeaders(1, 1:end);
learningMatrix(1:end, 1)           =   matrixHeaders(1:end, 1);
for row = 1 : size(matrix, 1)
    for col = 1 : size(matrix, 2)
        learningMatrix(row+1, col + 1) = {matrix(row, col)};
    end
end
clearvars data; clearvars matrixHeaders; clearvars matrix; clearvars row; clearvars col;
clearvars FILES;

%% Calculate learnings for all process parameters
outputMatrix={'No','cut','CutValues','Error', 'NodesNum', 'type', 'Test Data Distribution', 'Trainings Data Distribution' };
for learningVectorY = (noMeasurementsX+2): size(learningMatrix,2)
    % Get measurements
    X = cell2mat(learningMatrix(2:end, 2:(noMeasurementsX+1)));
    Xnames(1,1:noMeasurementsX)  = learningMatrix(1, 2:(noMeasurementsX+1));
    
    % Response
    Y = cell2mat(learningMatrix(2:end, learningVectorY));
    
    % Remove empty entries for learning
    remove = [];
    for row = 1 : size(X,1)
        for col = 1 : size(X,2)
            % Remember
            if (X(row, col)  == '-1')
                remove(end+1) = row;
                break;
            elseif(Y(row) == -1)
                remove(end+1) = row;
                break;
            end
        end
    end
    remove = sort(remove, 'descend');                                          % Start removal with the biggest entry
    for r = 1 : length(remove)
        %     Xnames(remove(r)) = [];
        X(remove(r),:) = [];
        Y(remove(r)) = [];
    end
    clearvars r col row;
     
    % Get learning feature, e.g. temperature or pH
    type = [cell2mat(learningMatrix(1,learningVectorY))];
    fprintf(['Learning of ' [type]]);

    % Run the algorithm 10 times to get statistic significance
    for i= 0 : 10;
        % 1. Define a dataSet of 40% test and 60% trainings data
        cv = cvpartition(size(X,1),'holdout',0.4);
        % Training set
        Xtrain = X(training(cv),:);
        Ytrain = Y(training(cv),:);
        % Test set
        Xtest = X(test(cv),:);
        Ytest = Y(test(cv),:);
        %disp('Training Set')
        yTrainTab = tabulate(Ytrain);
        %disp('Test Set')
        yTestTab = tabulate(Ytest);
        
        % Construct prediction tree
        t = classregtree(Xtrain, Ytrain, 'method','classification', 'names',Xnames','prune', 'on');
%       t = prune(r, 'level', max(prunelist(r)-1));
        % Validate Model
        yPredicted  = eval(t, Xtest);
        yPredicted2 = str2num(cell2mat(yPredicted));
        %disp('Confusion matrix');
        cm = confusionmat(Ytest,yPredicted2);           %# confusion matrix
        %disp('Confusion matrix in percent')
        c2 = cm /sum(sum(cm)) * 100;
        N = sum(cm(:));
        disp('err')
        err = ( N-sum(diag(cm)) ) / N             %# testing error
        
        % Statistics of the tree
        outputMatrix(end + 1, 1) = {i};
        cuts = t.cutvar;
        outputMatrix(end, 2) = cuts(1,1);
        points =  t.cutpoint;
        outputMatrix(end, 3) = {points(1, 1)};
        outputMatrix(end, 4) = {err};
        nodesNum = t.numnodes;
        outputMatrix(end, 5) = {nodesNum(1,1)};
        outputMatrix(end, 6) = {type};
        if (size(yTrainTab,1) == 2 && size(yTestTab,1) == 2)
            outputMatrix(end, 7) = {strcat(num2str(yTrainTab(1,1)), ': ', num2str(yTrainTab(1,2)), ' | ', num2str(yTrainTab(2,1)), ': ', num2str(yTrainTab(2,2)))};
            outputMatrix(end, 8) = {strcat(num2str(yTestTab(1,1)),  ': ', num2str(yTestTab(1,2)),  ' | ', num2str(yTestTab(2,1)), ': ', num2str(yTestTab(2,2)))};
%              tlines = textscan(evalc('t'), '%s', 'Delimiter', '\n');
             tlines = regexp(evalc('t'), '(?m)^.*$', 'match');
%              tlines=strread(evalc('t'),'%s','delimiter','\n');
            outputMatrix(end, 9) = {tlines};
        else
            outputMatrix(end, 7) = {'error'};
            outputMatrix(end, 8) = {'error'};
            outputMatrix(end, 9) = {'error'};
        end
     
        % Delete variables
        clearvars yPredicted yPredicted2 err, i, cuts, points, nodesNum;
        % Create Plots
        plot = view(t); 
        pause
   
        close(plot)% Plot the decission treet
    end
end
